1 The historical fingerprint and future impact of climate  
2 change on childhood malaria in Africa

3 Colin J. Carlson<sup>1,2,\*†</sup>, Tamma A. Carleton<sup>3,\*</sup>, Romaric C. Odoulami<sup>4</sup>, Cullen D.  
4 Molitor<sup>5</sup> and Christopher H. Trisos<sup>4</sup>

5 <sup>1</sup>*Department of Epidemiology of Microbial Diseases, Yale University School of Public Health*

6 <sup>2</sup>*Yale Center on Climate Change and Health, Yale University School of Public Health*

7 <sup>3</sup>*Department of Agricultural and Resource Economics, University of California, Berkeley*

8 <sup>4</sup>*African Climate and Development Initiative, University of Cape Town*

9 <sup>5</sup>*Bren School of Environmental Science & Management, University of California, Santa  
10 Barbara*

11 \**These authors share lead author status.*

12 †*Correspondence should be directed to [colin.carlson@yale.edu](mailto:colin.carlson@yale.edu).*

13 Submitted to *medRxiv* on August 6, 2024

14 **Abstract**

15 Health-related risks from climate change are growing exponentially<sup>1</sup>, but direct  
16 attribution of health outcomes to human influence on the climate remains challeng-  
17 ing<sup>2,3</sup>. Here, we leverage a comprehensive dataset of 50,425 population surveys<sup>4</sup> to  
18 investigate whether human-caused climate change has increased the burden of child-  
19 hood malaria across sub-Saharan Africa. In historical data, we find that prevalence  
20 shows a robust response to temperature and extreme precipitation, consistent with  
21 expectations from previous empirical and epidemiological work. Comparing his-  
22 torical climate reconstructions to counterfactual simulations without anthropogenic  
23 climate forcings, we find two-to-one odds that human-caused climate change has in-  
24 creased the overall prevalence of childhood malaria across sub-Saharan Africa since  
25 1901. We estimate that by 2014, human-caused climate change was responsible for  
26 an average of 87 excess cases of malaria per 100,000 children ages 2 to 10, with  
27 higher elevation and cooler regions in southern and east Africa experiencing greater  
28 increases. Under future climate change, we project that increasing temperatures  
29 could accelerate the elimination of malaria in west and central Africa, where the  
30 present-day burden is highest, with an average overall reduction of 94 (low green-  
31 house gas emissions, SSP1-RCP2.6) to 1,890 (high emissions, SSP5-RCP8.5) cases  
32 per 100,000 children in sub-Saharan Africa by the end of the century. However, we  
33 find that limiting future global warming to under 2°C (SSP1-RCP2.6) compared to  
34 3°C (SSP2-RCP4.5) could prevent an average of 505 excess cases in southern Africa,  
35 and 33 excess cases in east Africa, per 100,000 children by 2100. Our study resolves  
36 a decades-old debate about one of the first suspected health impacts of climate  
37 change, and provides a template for future work measuring its true global burden.

## 38 Main Text

39 Despite progress towards global eradication, malaria remains the single deadliest climate-  
40 sensitive infectious disease<sup>5</sup>. Malaria transmission is highly responsive to temperature,  
41 driven by both the life cycle of the ectothermic mosquito vectors (*Anopheles* spp.) and  
42 the thermal sensitivity of the parasites (*Plasmodium* spp.) themselves<sup>6,7</sup>. In laboratory  
43 conditions, *P. falciparum* transmission by *An. gambiae* peaks around 25°C, and becomes  
44 negligible below ~16°C or above ~34°C<sup>6,7,8</sup>. Given these biological constraints, climate  
45 change has become a major concern for populations potentially at risk of malaria in  
46 southern and high-elevation east Africa, where temperatures may no longer be prohibitive  
47 to malaria transmission<sup>9,10,11</sup>. On the other hand, in west and central Africa—where the  
48 burden of malaria is highest—many studies suggest that climate change will reduce or  
49 eventually preclude transmission<sup>9,10,12,13</sup>.

50 These risks were among the first proposed health impacts of climate change<sup>14,15</sup>, but  
51 have been surprisingly contentious, and even described as “hot air”<sup>16</sup> and “dangerous  
52 pseudoscience”<sup>17</sup>. Malaria experts have often claimed that observed warming trends are  
53 incompatible with long-term reductions in malaria prevalence across Africa, and warned  
54 that other factors like drug resistance and funding instability pose a more serious threat  
55 to malaria eradication<sup>16,18,19</sup>. Empirical evidence to test these assumptions is sparse,  
56 with the highest profile studies focusing on a single dataset of malaria incidence over  
57 several decades at a tea plantation in Kericho, Kenya. Since 2000, over a dozen studies  
58 have argued that these data either support<sup>20,21,22,23,24</sup> or undermine<sup>25,26,27,28,29,30,31</sup> the  
59 broader hypothesis that climate change is responsible for a resurgence of malaria in the  
60 east African highlands<sup>28,32,33,34,35</sup>. More recently, a study by Snow *et al.*<sup>4</sup> examined  
61 the last century of continent-wide changes in malaria prevalence, and concluded that  
62 observed trends could not be neatly explained by climate change, but did so based only  
63 on visual correspondence between moving averages of rainfall, minimum temperature,  
64 and modeled malaria prevalence over the entire continent.

65 In this study, we revisit these debates by applying state-of-the-art methods from  
66 detection and attribution, an area of climate science that quantifies the historical and  
67 real-time climate impacts of anthropogenic greenhouse gas emissions<sup>36,37</sup>. These meth-  
68 ods underpin the scientific consensus on human-caused climate change, and are regularly  
69 used to identify the role of climate change in the intensity, frequency, and distribution  
70 of specific extreme events (e.g., heatwaves, heavy precipitation, and droughts)<sup>38,39,40</sup>.  
71 However, attribution remains challenging for the downstream impacts of anthropogenic  
72 climate change on people and ecosystems, and methodological frameworks for impact  
73 attribution are still comparatively underdeveloped<sup>3,41,42</sup>. Applications to infectious dis-  
74 ease dynamics are especially challenging, as relationships between climate and disease  
75 transmission are often complex, nonlinear, and confounded by human intervention, and  
76 few epidemiological datasets exist with sufficient spatial and temporal scope to resolve  
77 these relationships. As a result, hundreds of studies have tested for correlations between  
78 climate and observed changes in disease incidence or prevalence, but very few have shown  
79 that these changes are causally attributable to anthropogenic climate change<sup>43,2</sup>.

80 Here, we draw on frameworks from climate science<sup>38,39,40</sup>, econometrics<sup>44,45</sup>, and epi-

81 demiology<sup>43,2</sup> to conduct an end-to-end impact attribution study (per<sup>42</sup>), measuring the  
82 direct effect of anthropogenic climate change on long-term trends in the burden of an in-  
83 fectious disease. We apply this framework to estimates of *falciparum* malaria prevalence  
84 in children aged 2-10 in sub-Saharan Africa ( $PfPR_{2-10}$ ), which experiences roughly 95%  
85 of the global burden of malaria (with 80% of deaths in children under the age of 5)<sup>46</sup>.  
86 We analyze a recently published dataset with unparalleled resolution and scope (Figure  
87 1), consisting of 50,425 surveys spanning more than a century (1900 to 2015)<sup>4</sup>, which we  
88 aggregate to 9,875 monthly average values at the first administrative (state or province)  
89 level. Leveraging climate econometric methods<sup>44,47,48</sup>, we develop a panel regression  
90 model that isolates the role of temperature and extreme precipitation from other con-  
91 founding factors that also shape malaria endemicity (Figure 2; see Methods for details).  
92 Nonparametric controls in the model (i.e., fixed effects) account for regional differences  
93 in seasonality, time periods with concerted elimination efforts, and other spatiotemporal  
94 variation not explained by identifiable factors, such as socioeconomic or ecological differ-  
95 ences between populations. To quantify statistical uncertainty in prevalence-climate re-  
96 lationships, we repeatedly estimate the model with 1,000 spatially-blocked bootstrapped  
97 samples. We apply these models to make predictions based on 10 sets of paired historical  
98 climate simulations with and without anthropogenic climate forcing, and estimate the  
99 impact of anthropogenic climate change on malaria prevalence from 1901 to 2014 (Figure  
100 3). Finally, we project how future climate change could further alter malaria prevalence  
101 between 2015 and 2100, based on three future climate change scenarios for low (SSP1-  
102 RCP2.6), intermediate (SSP2-RCP4.5), and high (SSP5-RCP8.5) future greenhouse gas  
103 concentrations (Figure 4).

#### 104 **A robust signal of climate sensitivity**

105 Over the last century, the prevalence of childhood malaria has exhibited a strong concave  
106 relationship with temperature (Figure 2A). Closely aligning with theoretical expectations  
107 that *P. falciparum* transmission by *Anopheles gambiae* mosquitoes should peak around  
108 25.6°C<sup>6</sup>, observed values of  $PfPR_{2-10}$  in our dataset peak around a monthly mean tem-  
109 perature of 25.8°C (Figure S1). Based on these biological expectations, we estimate  
110 the effect of temperature as a quadratic response in a panel regression model, and find  
111 that prevalence peaks at 24.9°C (95% confidence interval across the 1,000 bootstrapped  
112 models: 22.5°C, 27.0°C). These results confirm that laboratory-based studies approxi-  
113 mate malaria epidemiology in real populations quite well, and that temperature plays a  
114 substantial role in transmission dynamics: a 10°C increase or decrease from the optimal  
115 temperature lowers prevalence by ~8 percentage points.

116 The relationship between precipitation and malaria prevalence is more complex<sup>49</sup>,  
117 and likely less consequential for historical trends (Figures 2B, 2C). Contemporaneous  
118 monthly precipitation exhibits a nonlinear, but highly uncertain, relationship to preva-  
119 lence (see Figure S12). To parsimoniously capture nonlinear effects and disentangle  
120 divergent impacts of low and high precipitation, we define precipitation shocks with  
121 two binary indicator variables, equal to one when monthly precipitation falls below 10%  
122 (we label this a “drought shock”) or above 90% (“flood shock”) percentiles of monthly

123 precipitation calculated for each subnational unit. While drought and flood events are  
124 complex phenomena, which develop from the combination of multiple factors (e.g., soil  
125 conditions and topography) in addition to rainfall over varying timescales, we use this  
126 drought/flood terminology as shorthand to indicate extremely low or high precipitation  
127 months. Although most effects are statistically insignificant, we find that drought shocks  
128 tend to decrease malaria prevalence 1-2 months later, while conversely, flood shocks  
129 have a positive effect on prevalence 2-3 months later. These effects and their timing are  
130 broadly consistent with expectations about how precipitation mediates the availability  
131 of mosquito breeding habitat: dry-out kills larvae and eggs, while inundation creates  
132 new breeding habitat<sup>50,51,52,53,54,55,56,57</sup>. Sensitivity analyses were also weakly sugges-  
133 tive of another established mechanism, in which floods may wash away eggs and larvae,  
134 reducing transmission in the shorter term (see Figures S10 and S12). Overall, extreme  
135 precipitation has a measurable effect on malaria prevalence, but may be less important  
136 than temperature; however, given the sparsity of weather station data<sup>58</sup> and the uncer-  
137 tainty of precipitation reconstructions<sup>59</sup>, it is also possible that our analysis unavoidably  
138 underestimates the effect of precipitation due to measurement error.

139 Additional sensitivity analyses reinforce that these prevalence-climate relationships  
140 are both statistically robust and biologically consistent. Key findings are generally in-  
141 sensitive to alternative model specifications, such as: the inclusion of lagged effects of  
142 temperature (Figure S7); higher-order polynomial effects of temperature (Figure S11);  
143 alternative definitions of drought and flood shocks (Figures S8-S10); and alternative spa-  
144 tiotemporal controls, which account differently for variation over space (at region, coun-  
145 try, and state levels), time (including yearly and monthly variation), and interactions  
146 among space and time (Figure S6 and Table S2).

#### 147 **Historical impacts of climate change (1901-2014)**

148 We find that anthropogenic climate change has, more likely than not, been responsible  
149 for a small increase in the average prevalence of childhood malaria across sub-Saharan  
150 Africa since 1901 (Figures 2D). Compared to counterfactual simulations without anthro-  
151 pogenic climate forcing, we estimate that by 2010-2014, anthropogenic climate change  
152 had caused an increase in continental mean  $PfPR_{2-10}$  of 0.09 percentage points (*p.p.*;  
153 95% confidence interval: -0.30 *p.p.*, 0.51 *p.p.*). Simulations with an attributable increase  
154 in continent-wide mean prevalence outnumber those with losses by two to one (proportion  
155  $P_+$  of 10,000 paired factual versus counterfactual simulations with a positive difference  
156 in prevalence = 0.66). These increases are almost entirely driven by rising temperatures  
157 from anthropogenic climate forcing; the effects of drought and flood events on prevalence  
158 show no distinguishable signal from anthropogenic climate forcing over time (Figure S4).

159 This overall trend masks substantial regional heterogeneity in historical climate change  
160 impacts (Figure 3A; Figure S2), driven almost entirely by elevational and latitudinal  
161 gradients in temperature (Figure 3B,C). For example, attributable changes in prevalence  
162 across southern Africa are high in both magnitude and certainty, with an overall increase  
163 of 0.63 *p.p.* (95% CI: -0.04 *p.p.*, 1.40 *p.p.*;  $P_+ = 0.97$ )—nearly an order of magnitude  
164 greater than the continental mean. In contrast, climate change has contributed to signifi-

165 cantly lower malaria prevalence in west Africa (mean =  $-0.38$  *p.p.*; 95% CI:  $-0.90$  *p.p.*,  $0.02$   
166 *p.p.*;  $P_+ = 0.03$ ), where temperatures already often exceed the biological optimum for  
167 transmission. In the central African basin, a stronghold of malaria endemicity with av-  
168 erage temperatures close to the  $25^\circ\text{C}$  optimum, the change in prevalence attributable to  
169 anthropogenic climate change is positive, relatively small, and uncertain (mean =  $0.18$   
170 *p.p.*; 95% CI:  $-0.19$  *p.p.*,  $0.61$  *p.p.*;  $P_+ = 0.83$ ). Finally, we estimate a meaningful overall  
171 increase in prevalence attributable to anthropogenic climate change in east Africa (mean  
172 =  $0.33$  *p.p.*; 95% CI:  $-0.14$  *p.p.*,  $0.87$  *p.p.*;  $P_+ = 0.91$ ), but note that changes in prevalence  
173 are distributed unevenly along the steep elevational gradient: increases of up to 1-2 *p.p.*  
174 in the Ethiopian highlands and the greater Rift Valley region are accompanied by small  
175 but significant local declines throughout lowland areas in Ethiopia, Sudan, South Sudan,  
176 Eritrea, and Djibouti.

177 While these effects are meaningful, we caution that they are also far smaller than  
178 the reduction achieved through healthcare, mosquito nets, vector control, and economic  
179 development: previous work with the same dataset has estimated a reduction since 1900  
180 of 16 *p.p.* (that is, a continent-wide decline in average  $PfPR_{2-10}$  from 40% in 1900-1929  
181 to 24% by 2010-2015<sup>4</sup>), while our estimates of historical climate change-attributable  
182 changes rarely exceed 1.5 *p.p.* for any individual administrative region. Additionally,  
183 we estimate that average reductions in prevalence realized during the Global Malaria  
184 Eradication Program (1955-1969; estimated reduction averaged over the entire period:  
185  $-4.80$  *p.p.*) and recent programs like Roll Back Malaria and the Global Technical Strat-  
186 egy (2000-2014; estimated reduction averaged over the entire period:  $-3.35$  *p.p.*) were  
187 substantially larger than the cumulative effects of anthropogenic climate change (Table  
188 S2). Relatively small and spatially differentiated climate-related changes in burden could  
189 have been easily concealed by the greater impact of these programs, highlighting both  
190 the success of elimination programs and the importance of using an empirical approach  
191 like ours to isolate the effect of climate from other co-evolving factors.

## 192 **Future impacts of climate change (2015-2100)**

193 Despite contemporary trends, we project that within the next quarter-century, anthro-  
194 pogenic climate change will begin to reduce the prevalence of *falciparum* malaria in  
195 sub-Saharan Africa (Figure 2D; Table S1). This trend is driven largely by rising temper-  
196 atures in lowland areas north of the equator, with greater possible reductions in higher  
197 greenhouse gas emissions scenarios (Figure 4). In these scenarios, temperature-related  
198 declines are slightly offset by floods, which will become more frequent across Africa<sup>36</sup>,  
199 although their impact on overall trends is trivial when compared to temperature (Figure  
200 S5). Even in a future low emissions scenario (SSP1-RCP2.6: average global warming  
201 across models of  $+1.8^\circ\text{C}$  in 2048-2052;  $+1.9^\circ\text{C}$  in 2096-2100), increases in prevalence  
202 due to historical anthropogenic climate change are projected to essentially be offset by  
203 mid-century, stabilizing around an  $-0.09$  *p.p.* (95% CI:  $-0.41$  *p.p.*,  $0.17$  *p.p.*) projected  
204 decline across sub-Saharan Africa, relative to 2015-2020. In a high emissions scenario  
205 (SSP5-RCP8.5:  $+2.4^\circ\text{C}$  in 2048-2052;  $+5.2^\circ\text{C}$  in 2096-2100), we project decreases in  
206 prevalence would accelerate over time, reaching an average of  $-0.24$  *p.p.* (95% CI:  $-0.80$

207 *p.p.*, 0.26 *p.p.*) by mid-century, and -1.90 *p.p.* (95% CI: -4.85 *p.p.*, -0.07 *p.p.*) by the end  
208 of the century—a projected reduction that begins to approach the magnitude of some  
209 historical eradication programs.

210 Though the balance across regions will begin to shift, the geographic pattern of  
211 future changes in malaria prevalence is likely to reproduce present-day heterogeneity in  
212 impacts, as malaria transmission continues to shift along latitudinal and elevational clines  
213 in temperature (Figure 4; Figure S3). West Africa is projected to experience the most  
214 dramatic transformation, especially in a high-emissions scenario (SSP5-RCP8.5), with  
215 a projected decline of -1.04 *p.p.* (95% CI: -1.86 *p.p.*, -0.36 *p.p.*) by mid-century, and  
216 a staggering -4.25 *p.p.* (95% CI: -8.78 *p.p.*, -1.52 *p.p.*) decrease by 2100. Similar but  
217 shallower declines are projected in central Africa, where end-of-century reductions could  
218 reach between -0.06 *p.p.* (SSP1-RCP2.6; 95% CI: -0.43 *p.p.*, 0.24 *p.p.*) and -1.43 *p.p.*  
219 (SSP5-RCP8.5; 95% CI: -4.36 *p.p.*, 0.37 *p.p.*). On the other hand, localized increases  
220 in prevalence will continue in the cooler parts of the Ethiopian highlands, the greater  
221 Rift Valley region, and coastal southern Africa, potentially reaching 5 *p.p.* or more in  
222 some areas. The overall effect across east and southern Africa is a projected increase in  
223 prevalence, except in the highest emissions scenario (SSP5-RCP8.5), where both regions  
224 start to experience declines by mid-century, with east Africa eventually falling -0.60 *p.p.*  
225 (95% CI: -2.72 *p.p.*, 0.95 *p.p.*) below present-day levels by 2100.

226 Broadly, our results suggest that the main effect of climate change mitigation will  
227 be to keep average temperatures in sub-Saharan Africa closer to the optimum range for  
228 malaria transmission. However, for many cooler localities, such as in east and southern  
229 Africa, greenhouse gas emissions reductions would prevent substantial climate change-  
230 driven increases in malaria prevalence. By mid-century, limiting global warming to below  
231 the +2°C limit in the Paris Agreement (achieved under SSP1-RCP2.6) is projected to  
232 prevent an estimated 163 cases of malaria per 100,000 children in southern Africa and 20  
233 cases per 100,000 children in east Africa compared to an intermediate emissions scenario  
234 (SSP2-RCP4.5: +2.0°C in 2048-2052; +3.0°C in 2096-2100). By the end of the century,  
235 these benefits would be even greater, with 505 and 33 excess cases averted per 100,000  
236 children in southern and east Africa, respectively (Table S1). At a more local scale, these  
237 benefits could be at least an order of magnitude greater (Figure S3).

## 238 Discussion

239 In this study, we apply an end-to-end impact attribution framework to a century of  
240 malaria surveillance, allowing us to estimate the historical and projected future impact  
241 of anthropogenic climate change on childhood malaria in sub-Saharan Africa. We find  
242 a 66% likelihood that anthropogenic climate change since 1901 has increased malaria  
243 burden; on average across Africa, an estimated 87 excess malaria cases per 100,000 peo-  
244 ple can be attributed to historical human-caused climate change. However, this burden  
245 falls disproportionately on southern and east Africa; we estimate a 97% and 91% likeli-  
246 hood, respectively, that anthropogenic climate change has increased present-day malaria  
247 prevalence in these regions. We project that prevalence in both southern and east Africa  
248 will remain elevated in the future: even in a low emissions scenario likely to limit global

249 warming below +2°C (SSP1-RCP2.6), we estimate these regions will face 339 and 98 ex-  
250 cess cases of malaria per 100,000 children by 2100, respectively. In contrast, across many  
251 other regions of Africa, we project that the overall impact of future climate change will  
252 be a net reduction in malaria: these changes are projected to be most dramatic in west  
253 and central Africa, where future climate change could reduce prevalence by up to ~4,200  
254 (west Africa) and ~1,400 (central Africa) cases per 100,000 children in a high-emissions  
255 scenario (SSP5-RCP8.5). Our results suggest that climate change could be synergistic  
256 with eradication efforts in countries like Nigeria and the Democratic Republic of the  
257 Congo, where the present-day burden of malaria is highest, but will continue to create  
258 new risks in countries like Ethiopia and South Africa.

259 Spanning multiple centuries, our analysis is the most comprehensive look to date  
260 at the impact of climate change on any infectious disease, and brings new clarity to a  
261 decades-long debate in malaria research. Whereas some work has questioned the plau-  
262 sibility that overall declines in continent-wide prevalence would conceal a climate-linked  
263 increase<sup>4,19</sup>, the 0.087 percentage point increase in  $PfPR_{2-10}$  that we attribute to histor-  
264 ical anthropogenic climate change could easily be masked by the nearly 200-fold greater  
265 overall reduction observed across sub-Saharan Africa over the same period. Our regional  
266 estimates also generally align with previous lab-based or site-specific empirical work,  
267 which suggests that east and southern Africa are experiencing shifts towards tempera-  
268 tures that are permissive to transmission for the first time or over longer seasons<sup>9,10</sup>,  
269 while in west and central Africa, climate change impacts have been harder to detect, and  
270 future warming might exceed the physiological limits of malaria transmission<sup>9,10,13,60</sup>.  
271 Notably, our study does provide robust, empirical evidence that human-caused climate  
272 change has at least marginally contributed to malaria resurgence in high-altitude Kenya  
273 and Ethiopia, consistent with local epidemic time series or simulated dynamics based on  
274 local weather station data<sup>21,24,34</sup>.

275 Our study therefore reconciles three long-standing ideas that are sometimes treated  
276 as paradoxical: anthropogenic climate change is not the primary force shaping past, or  
277 probably future, trends in malaria prevalence<sup>4,16,19</sup>. However, anthropogenic climate  
278 change has increased the burden of malaria in sub-Saharan Africa<sup>14,15,21,24</sup>, and at high  
279 elevations and latitudes, will continue to for several more decades<sup>9,10</sup>. Nevertheless,  
280 rising temperatures at lower latitudes and elevations in Africa will mostly align with  
281 future efforts to eradicate *Plasmodium falciparum* from sub-Saharan Africa<sup>10,19,60</sup>.

282 In spite of climate change, elimination campaigns have already achieved substan-  
283 tial reductions in malaria endemicity over the last century. This history underscores  
284 the value of disease surveillance, healthcare, and vector control as core components of  
285 climate change adaptation, as well as the plausibility of malaria eradication within a  
286 generation<sup>61</sup>—a point echoed by the recent work on the elimination of malaria from  
287 Hainan Island in China<sup>62</sup>. At the same time, several recent anecdotes have raised rel-  
288 evant concerns about the fragility of elimination, such as the resurgence of malaria in  
289 Ecuador and Peru associated with migration from Venezuela<sup>63</sup>, or the estimated 10,000  
290 excess deaths due to malaria – and 3.5 million untreated cases – caused by healthcare  
291 disruptions during the 2014 Ebola virus epidemic in West Africa<sup>64</sup>. Concerns about

292 climate-linked resurgence are also more credible given the ongoing invasion of the *An.*  
293 *stephensi* mosquito, which thrives in cities, has already been reported in several locations  
294 in east Africa, and may be able to transmit *P. falciparum* up to much higher tempera-  
295 tures ( $\sim 37^{\circ}\text{C}$ ) than *An. gambiae* can ( $\sim 30^{\circ}\text{C}$ )<sup>8,65</sup>. If *An. stephensi* were to become a  
296 dominant vector across the continent, climate change might become an even more press-  
297 ing concern<sup>66,67</sup>. These risks only add more urgency to the global goals of eliminating  
298 both malaria and greenhouse gas emissions.



## 299 Methods

### 300 Malaria prevalence data

301 We use a recently published database of *Plasmodium falciparum* clinical prevalence in  
302 Sub-Saharan Africa<sup>4</sup>. This compendium, compiled by Snow *et al.* over more than  
303 two decades, is one of the most spatially and temporally complete publicly-available  
304 databases of infectious disease burden. The database covers the period from 1900 to  
305 2015, though sampling has increased substantially since the turn of the century (pre-2000:  
306  $n = 32,533$ ; post-2000:  $n = 17,892$ ). Most prevalence surveys used microscopy for diag-  
307 nostics ( $n = 36,805$ ) but a substantial portion of data also derive from rapid diagnostic  
308 tests ( $n = 11,154$ ). The data have been compiled from a mix of archival research through  
309 public health documents, including the records of colonial governments and elimination  
310 campaigns from different periods; national survey data; electronic records published in  
311 peer-reviewed journals and grey data sources (e.g., World Health Organization technical  
312 documents); and a mix of other sources compiled by international organizations. Records  
313 were georeferenced in the original study using a standard set of protocols, with a 5km  
314 grid uncertainty threshold for point data, and broader areas stored as administrative  
315 polygons. In total, the data include a total of 50,425 prevalence surveys at a total of  
316 36,966 unique georeferenced locations.

317 For our models, we used the estimates of malaria prevalence for children aged two  
318 to ten years old, as *falciparum* malaria has the highest mortality in children and preg-  
319 nant women. The Snow *et al.* data cover all available prevalence surveys, including all  
320 age ranges, but were converted by the authors of the original study to a standardized  
321 estimate of prevalence in children aged 2-10 ( $PfPR_{2-10}$ ), using a catalytic conversion  
322 Muench model. For our model, we aggregated data by averaging  $PfPR_{2-10}$  at the first  
323 administrative level within-country (i.e., state or province level, or as shorthand, ADM1),  
324 using shapefiles provided by the Database of Global Administrative Areas dataset version  
325 3.6 ([www.gadm.org](http://www.gadm.org)). This provided sufficient granularity to capture climate impacts and  
326 local heterogeneity in confounders, while ensuring sufficient data coverage within these  
327 units. This aggregation scale is supported by previous work that models this dataset at  
328 the same spatial resolution<sup>4</sup>.

### 329 Climate data

330 We used two sets of climate data in this study. The first is an observational dataset  
331 from the Climatic Research Unit (hereafter, CRU-TS; version 4.03 for model training  
332 and bias correction), which is constructed from monthly observations from extensive  
333 networks of meteorological stations from around the globe<sup>68</sup>. CRU-TS provides land-  
334 only climatic variables at a high spatial resolution of  $0.5^\circ \times 0.5^\circ$  extending from 1901 to  
335 present (though our analysis is limited to the period 1901-2014). The second set of data  
336 is from ten global climate models (GCMs) selected from the sixth phase of the Coupled  
337 Model Intercomparison Project (CMIP6). In our historical analysis, we analysed (per  
338 GCM) one model realization of the “Historical” simulation, which includes anthropogenic

339 greenhouse gas emissions, and one realization from the “Historical-Natural” simulation,  
340 which includes only solar and volcanic climate forcing. For both the Historical and  
341 Historical-Natural (hereafter and in the main text, “historical climate” and “historical  
342 counterfactual”) simulations, we analysed the period 1901-2014.

343 To investigate the continued effect of climate change on malaria prevalence between  
344 2015 and 2100, we analysed three CMIP6 future climate change simulations from each  
345 of the 10 GCMs. Shared socio-economic pathways (SSPs) refer to the level of potential  
346 future global development (social, economic, and technological) and the implication for  
347 climate change mitigation and/or adaptation actions or policy<sup>69,70</sup>. SSPs are combined  
348 with various possible future radiative forcings (representative concentration pathways;  
349 RCPs) to form the climate change scenarios used in CMIP6. Of the available SSP–RCP  
350 scenarios, we selected and used three. The first two suggest enhanced human develop-  
351 ment outcomes with increased potential towards a more sustainable (SSP1<sup>71</sup>) or a less  
352 sustainable (SSP5<sup>72</sup>) economy. The third, SSP2<sup>73</sup>, is a mid-way scenario, which assumes  
353 a future that mostly follows historical trends<sup>70</sup>. We selected these scenarios in combina-  
354 tion with a low (SSP1-RCP2.6), intermediate (SSP2-RCP4.5), and high (SSP5-RCP8.5)  
355 greenhouse gas concentration scenario.

356 We apply a standard quantile-quantile (Q-Q) bias-correction<sup>74,75</sup> to the CMIP6 pre-  
357 cipitation and temperature datasets for both of the historical simulations for the period  
358 1901-2014, and all three future simulations for the period 2015-2100. Before the bias-  
359 correction, we first remap all simulated CMIP6 precipitation and temperature datasets  
360 to the same grid cell size ( $0.5^\circ \times 0.5^\circ$ ) as the CRU-TS observation data. We then per-  
361 form for each CMIP6 model, the Q-Q bias correction at each grid-point by mapping the  
362 quantile values ( $q_i$ ) for the empirical cumulative distribution functions for each of the 12  
363 months over the period 1901-2014 (for each grid point) onto the corresponding quantiles  
364 in the observational dataset (CRU-TS), so that the observed precipitation or tempera-  
365 ture values associated with  $q_i$  become the bias-corrected value in the simulations. For  
366 the counterfactual (and future) simulations, we first determine, at each grid-point, for  
367 each value of precipitation or temperature (for each month) over the period 1901-2014  
368 (2015-2100) the equivalent quantile ( $q_j$ ) in the factual simulation and then identify the  
369 precipitation or temperature value associated with  $q_j$  in the observational dataset as the  
370 bias-corrected value. We detrended both precipitation and temperature datasets before  
371 applying the bias-correction procedure, and then added the trends back after<sup>75</sup>.

372 For every climate dataset (all CRU-TS and CMIP6 models), we extract the average  
373 value of monthly precipitation and temperature within each ADM1 unit. To construct  
374 polynomial variables for temperature and precipitation (see below), all data were trans-  
375 formed at the grid cell level prior to aggregation to the ADM1 unit; extreme precipitation  
376 cutoffs were defined at the ADM1 level and so were applied after aggregation.

## 377 **Statistical model**

378 The influence of climatic conditions on malaria prevalence has been heavily studied us-  
379 ing transmission models based in vector ecophysiology and calibrated using laboratory  
380 experiments<sup>6,7</sup>. The important benefit of this approach is that the mechanistic links

381 between a particular environmental condition (e.g., temperature) and malaria prevalence  
382 in the human population, such as effects on biting rate and survival probability, can be  
383 independently isolated. However, this approach is limited in its ability to generalize to  
384 real-world contexts, where complex socioeconomic factors interact with modeled relation-  
385 ships based on laboratory conditions. Clinical data, which measures malaria prevalence in  
386 human populations, has been used to validate modeled results<sup>6</sup>, but inconsistent findings  
387 arise due to challenges in statistically isolating the role of climate from the many corre-  
388 lated factors influencing prevalence, such as public health interventions, drug resistance,  
389 conflict and social instability, and economic shocks<sup>19,60,76,77,78</sup>.

390 This study seeks to provide generalizable population-scale evidence of the malaria-  
391 climate link across sub-Saharan Africa using field-collected clinical data and a statistical  
392 approach designed to isolate changing environmental conditions from spatiotemporal con-  
393 founding factors. Specifically, we draw on the climate econometrics literature<sup>47</sup>, which  
394 has developed causal inference approaches to quantify and project the impacts of anthro-  
395 pogenic climate change on a host of socioeconomic outcomes, from agricultural yields<sup>79</sup>,  
396 to civil conflict<sup>80</sup>, to all-cause mortality<sup>48</sup>. This approach is designed to approximate  
397 controlled experiments by semi-parametrically accounting for unobservable spatial and  
398 temporal confounding factors, isolating variation in the climate system that is as good as  
399 randomly assigned<sup>81</sup>. This approach is often referred to as “reduced-form”, as it allows for  
400 a causal interpretation of recovered relationships between socioeconomic conditions and  
401 the climate, but it does not easily enable the researcher to isolate individual *mechanisms*  
402 linking a changing climate to shifts in outcomes (e.g., mosquito population dynamics or  
403 parasite development rates). However, causal estimates enable counterfactual simulation  
404 in which climate is changed and all other factors are held constant; this is the exercise  
405 conducted here and in many applications of climate econometric frameworks. More-  
406 over, these relationships can be used to calibrate more structured transmission models  
407 by providing empirical grounding from observational data.

408 We develop a statistical model using monthly survey-based malaria prevalence data  
409 for children aged 2 to 10 ( $PfPR_{2-10}$ ) covering all of sub-Saharan Africa over 115 years.  
410 Our outcome variable is the average prevalence for each first administrative unit  $i$  (e.g.,  
411 province or state) in country  $c$  during month  $m$  and year  $t$ , which we denote  $PfPR_{icmt}$ .  
412 We estimate prevalence as a flexible function of monthly temperature  $T_{icmt}$  and precipi-  
413 tation  $P_{icmt}$  variables as follows:

$$PfPR_{icmt} = f(T_{icmt}) + \sum_{\ell=0}^L g_{\ell}(P_{icm-\ell t}) + \alpha_i + \gamma_{rm} + h_c(\text{date}_{mt}) \quad (1)$$
$$+ \delta_1 \mathbb{1}\{\text{intervention 1}\}_{mt} + \delta_2 \mathbb{1}\{\text{intervention 2}\}_{mt} + \varepsilon_{icmt}$$

414 where  $f(\cdot)$  and  $g(\cdot)$  represent nonlinear transformations of grid-cell level temperature and  
415 precipitation conditions, respectively, and where  $\ell$  subscripts indicate monthly temporal  
416 lags. In our main specification, we model  $f(\cdot)$  as a quadratic in contemporaneous average  
417 temperature, while  $g(\cdot)$  contains a vector of dummy variables indicating whether an

418 administrative unit’s monthly rainfall can be categorized as drought (defined as  $\leq 10\%$   
419 of the long-run location- and month-specific mean) or flood (defined as  $\geq 90\%$  of the  
420 long-run location- and month-specific mean) during month  $m - \ell$ . We allow for up to  
421 three monthly lags (i.e.,  $L = 3$ ) for these extreme precipitation conditions in our  
422 main specification, based on hypotheses from prior literature regarding the timescales of  
423 larvae drying and of “flushing”<sup>50,53,82</sup>. A variety of sensitivity analyses detailed below  
424 demonstrate that key findings are robust to including lags for temperature (Figure S7), to  
425 the drought and flood cutoffs used for precipitation (Figures S8-S10), and to alternative  
426 functional forms of temperature (Figure S11).

427 Equation 1 uses a suite of semi-parametric spatiotemporal controls to isolate plau-  
428 sibly random variation in climatological conditions, following standard practices in the  
429 climate impacts literature.<sup>47,45</sup> First,  $\alpha_i$  is a vector of indicator variables for each of 853  
430 first administrative units (i.e., “ADM1” units) across our multi-country sample. These  
431 spatial “fixed effects” control for all time-invariant characteristics of an administrative  
432 unit that may confound the relationship between temperature, rainfall, and prevalence.  
433 For example, higher altitude regions may exhibit cooler temperatures, but they also may  
434 be composed of lower-income and more geographically isolated communities with lim-  
435 ited access to malaria prevention interventions. By controlling for mean conditions in  
436 each location, these spatial fixed effects avoid conflating climate conditions with other  
437 geographic correlates.

438 Second,  $\gamma_{rm}$  is a vector of region-by-month-of-year indicator variables, where regions  
439 are defined using the Global Burden of Disease (GBD) regional definitions of western,  
440 southern, central, and eastern Africa (see Figure 2 in ref.<sup>83</sup>). These spatiotemporal fixed  
441 effects account for region-specific seasonality in prevalence that may spuriously relate to  
442 seasonally-varying climatological conditions. We allow these seasonal controls to vary by  
443 region because of large differences in climatological seasonality and in malaria cyclicity  
444 across sub-Saharan Africa<sup>84</sup>, and we show below that our main findings are robust to  
445 more stringent seasonality controls defined at the country level (Figure S6). Third,  
446  $h_c(\cdot)$  is a nonlinear, country-specific function that controls for country-specific gradual  
447 trends that may confound the malaria-climate relationship, particularly under historical  
448 conditions of anthropogenic climate change. In our main specification, we model  $h_c(\cdot)$  as a  
449 quadratic. Figure S6 shows that our results are robust to multiple alternative approaches  
450 to controlling for long-run trends that may vary across space.

451 Finally, the indicator variables  $\mathbb{1}\{\text{intervention 1}\}_{mt}$  and  $\mathbb{1}\{\text{intervention 2}\}_{mt}$  are equal  
452 to one when an observation falls into the 1955-1969 or 2000-2015 period, respectively.  
453 These two periods saw substantial malaria intervention programs across the subconti-  
454 nent, leading to considerable declines in malaria that were unrelated to changes in the  
455 climate<sup>4,85</sup>. These indicator variables control for shocks to prevalence during these two  
456 periods, and the coefficients  $\delta_1$  and  $\delta_2$  allow for differential effectiveness of the two dis-  
457 tinct intervention periods. While these variables are highly statistically significant (Table  
458 S2), our main findings are robust to their exclusion (Figure S6).

459 Together, these set of flexible controls imply that the residual variation in temperature  
460 and precipitation events used to identify the functions  $f(\cdot)$  and  $g(\cdot)$  is month-to-month

461 variation over time within the same location, after controlling for gradual country-specific  
462 trends, regional seasonality, and the aggregate effects of two substantial malaria preven-  
463 tion intervention programs. When reporting regression results directly (e.g., in Table  
464 S2), we cluster standard errors  $\varepsilon_{icmt}$  at the ADM1 level to account for serial correlation  
465 within the same location. When computing bootstrap samples (e.g., shown in Figure  
466 2), we repeatedly re-estimate Equation 1 after block-resampling the full dataset using  
467 ADM1-level blocks to account for this same serial correlation.

## 468 **Statistical model sensitivity and robustness**

469 In this section, we describe a set of model sensitivity analyses that probe the robustness  
470 of our empirical model. Specifically, we investigate sensitivity of our key findings to:  
471 alternative spatiotemporal controls; inclusion of dynamic temperature effects; alternative  
472 definitions of extreme rainfall events; and alternative functional forms for the prevalence-  
473 temperature relationship.

### 474 **Alternative spatiotemporal controls**

475 Our preferred empirical specification in Equation 1 includes first administrative unit fixed  
476 effects (i.e., indicator variables), region-by-month-of-year fixed effects, country-specific  
477 quadratic time trends, and two indicator variables for each of two malaria intervention  
478 periods (1955-1969 and 2000-2015). Figure S6 shows that our estimated prevalence-  
479 temperature relationship is highly robust to many alternative spatial and temporal con-  
480 trols. All panels in this figure include ADM1 fixed effects to control for time-invariant  
481 characteristics that may confound the relationship between prevalence and temperature,  
482 but each panel varies in the additional spatial and/or temporal controls included in the  
483 regression. A tabular version of these results is shown in Table S2. While the temper-  
484 ature at which prevalence peaks changes slightly across model specifications, it remains  
485 within a degree of the 24.9°C value from our preferred specification for most models,  
486 particularly those including time trends that are spatially differentiated (note that peak  
487 temperatures indicated in Figure S6 are rounded to the nearest degree for display pur-  
488 poses). Predictably, stringent controls, such as region-by-year and country-by-month  
489 fixed effects, tend to increase statistical uncertainty. However, overall the estimated  
490 shape and magnitude of the prevalence-temperature relationship remain robust to alter-  
491 native spatial and temporal controls.

### 492 **Dynamic temperature effects**

493 Our preferred empirical specification estimates contemporaneous (within one month) and  
494 lagged (up to three months) effects of extreme rainfall on malaria prevalence, but only  
495 contemporaneous effects of temperature. While it is possible that temperature also ex-  
496 hibits lagged effects, we show in Figure S7 that the cumulative effect of temperature on  
497  $PfPR_{2-10}$  is very similar whether zero, one, two, or three months of lagged temperatures  
498 are accounted for. The prevalence response to temperature does become slightly stronger

500 with three months of lags, suggesting that our historical and future climate predictions  
501 shown throughout the main text may be somewhat conservative. However, overall these  
502 findings suggest that climate change impact predictions are unlikely to change meaning-  
fully under different assumptions of the lag structure of temperature exposure.

### 503 **Alternative definitions of extreme rainfall events**

504 Our main empirical specification defines drought as months for which total precipitation  
505 is less than or equal to 10% of the long-run location- and month-specific mean. Flood is  
506 analogously defined as months for which total precipitation is greater than or equal to 90%  
507 of the long-run location- and month-specific mean. Here, we investigate the sensitivity  
508 of our main findings to these definitions. To do so, we systematically vary both the  
509 drought and flood cutoff values, ranging from <1% to <20% for drought and from >85%  
510 to >95% for flood. Figure S8 shows that the relationship between malaria prevalence and  
511 temperature is insensitive to the definition of drought and flood events. Figure S9 shows  
512 that under most drought and flood definitions, extremely low precipitation events have  
513 a negative effect on prevalence with a lag of 1-2 months. However, this effect is rarely  
514 statistically significant. Figure S10 shows that extremely high rainfall events increase  
515 prevalence with a lag of 2-3 months, a result that is statistically significant and highly  
516 robust to alternative drought and flood definitions. In general, these sensitivity analyses  
517 show that our main findings are not sensitive to the specific definitions of drought and  
518 flood used in estimation of Equation 1.

### 519 **Alternative functional forms for the prevalence-temperature relationship**

520 Following from theoretical and laboratory-based literature (e.g., refs. <sup>6,7</sup>), we model the  
521 prevalence-temperature relationship as quadratic. However, Figure S11 shows that this  
522 relationship is similar when more flexible functional forms are used. In particular, the  
523 temperature at which prevalence peaks changes little when higher order polynomials are  
524 estimated. Estimating higher order polynomials increases uncertainty, particularly in the  
525 tails of the temperature distribution, but point estimates are similar across the majority  
526 of the observed temperature range.

### 527 **Predictions**

528 In both historical and future simulations, we apply the estimated panel regression to  
529 calculate the effect of climate change on  $PfPR_{2-10}$ . Our predictions capture the full  
530 range of statistical uncertainty (1,000 bootstrapped model estimates) and climate model  
531 uncertainty (10 climate models), producing a total of 10,000 estimates of historical or  
532 future impacts in any given scenario. Each of these 10,000 estimates is normalized to a  
533 long-run baseline (past: 1901-1930; present: 2015-2020) before estimates are averaged,  
534 creating an estimate of climate change impacts relative to that baseline. In our historical  
535 analyses, we only use these models to estimate changes in prevalence attributable to  
536 climate change: while the panel regression model accounts for other historical drivers

537 through the fixed effects structure, these are not the focus of our analysis, and so we  
538 choose not to estimate total prevalence including these effects. Similarly, we elect not  
539 to make assumptions about non-climate drivers of malaria prevalence in the future, and  
540 thus do not apply the model to predict future trends in overall prevalence.

541 For overall trends (e.g., reported in Figures 2D, 3D, and 4D), we generated continent-  
542 wide averages or four regional averages using the unweighted average of estimates for each  
543 ADM1 unit. This is a deliberate oversimplification, as we do not adjust averages based  
544 on either ADM1 units' land area or the estimated population they contain; we made this  
545 decision based on the challenges of reconstructing historical population density at fine  
546 scales, as well as the need to otherwise make assumptions about how disease burden is  
547 allocated over space (e.g., the distribution of transmission across rural or urban areas).  
548 For similar reasons, we chose not to estimate the effect of prevalence changes on overall  
549 malaria incidence. Although some studies have attempted this using a linear conver-  
550 sion with total population<sup>86</sup>, proper estimation of incidence (and the effects of treatment  
551 variables, through prevalence, on case burden) requires malaria transmission models that  
552 require substantially more demographic assumptions<sup>85</sup>. Future work could explore both  
553 of these methodologically-complex directions, and potentially generate finer-scale esti-  
554 mates of how many cases of childhood malaria, and resulting deaths, are attributable to  
555 climate change.

556 **Acknowledgements**

557 We thank Sadie Ryan and Rory Gibb for thoughtful conversations that supported this  
558 work, and Jonathan Proctor for constructive feedback on the manuscript. CHT was  
559 supported by the University of Cape Town Future Leaders Programme and by the FLAIR  
560 Fellowship Programme: a partnership between the African Academy of Sciences and the  
561 Royal Society funded by the UK Government's Global Challenges Research Fund. RCO  
562 was supported by the Carnegie Corporation of New York through the Development of  
563 Emerging Academic Leaders (DEAL) in Africa and the German Academic Exchange  
564 Service (DAAD) ClimapAfrica programme.

565 **Data Availability**

566 No original data are generated or reported in our study. All data used in analyses,  
567 including both malaria and climate data, is freely available and referenced in the Methods.

568 **Code Availability**

569 All code is available at [github.com/cjcarlson/falciparum](https://github.com/cjcarlson/falciparum).



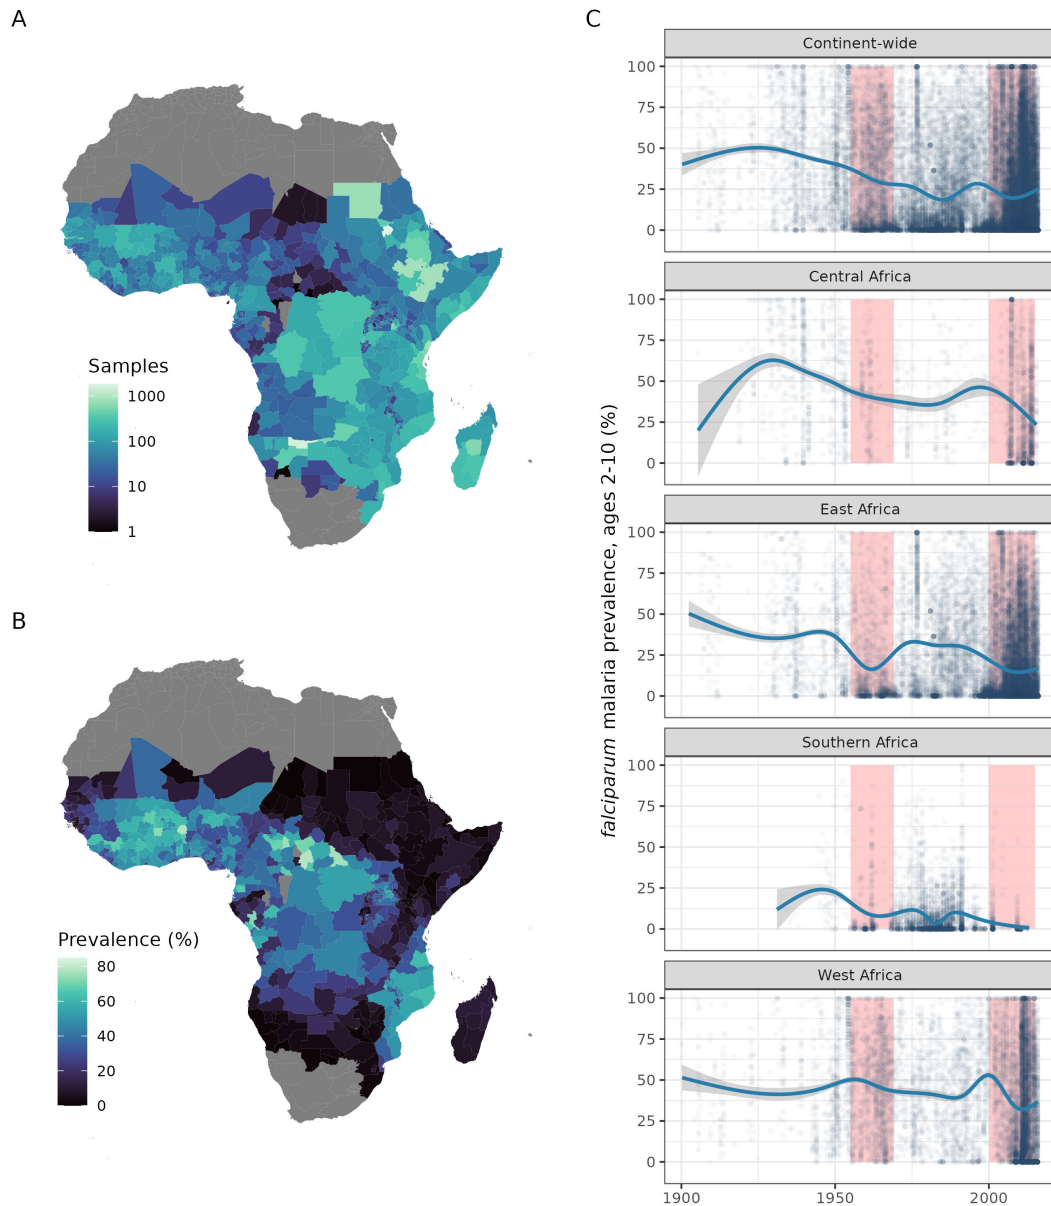

Figure 1: **Malaria prevalence observations from 1900 to 2015.** (A) The total number of malaria prevalence surveys in children ages 2 to 10 in the 20<sup>th</sup> and early 21<sup>st</sup> century, as measured by Snow *et al.*<sup>4</sup> and aggregated to the first administrative unit (ADM1). (B) Mean reported prevalence of childhood malaria over the entire sample (1900-2015, with temporal coverage varying across space). (C) Observed trends in malaria prevalence, broken down by Global Burden of Disease Study regions (see main text): each point is a single survey in the original dataset, while generalized additive models are used to construct estimated trend lines (shown in solid blue, with grey shading showing the model's 95% confidence interval). Pink vertical bars indicate notable periods of successful malaria prevention intervention: the Global Malaria Eradication Programme (1955-1969) and the modern period including the Roll Back Malaria programs and Global Technical Strategy (2000-2014).

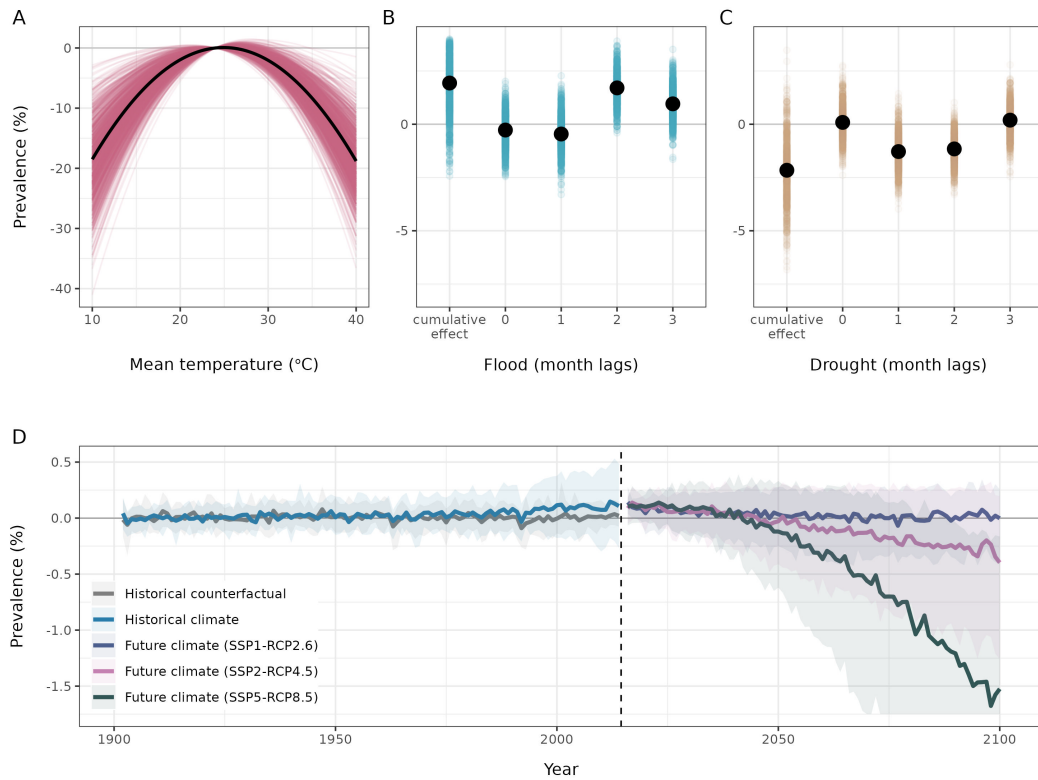

**Figure 2: Empirical estimates of prevalence-climate relationships and predictions of climate change impacts from 1901 to 2100.** (A) The estimated relationship between temperature and prevalence (point estimate in black; bootstrapped estimates in red). (B,C) The effects of extreme precipitation events (flood and drought) in the month they occur (0 lag) and after time has passed (1, 2, 3 month lags), as well as the cumulative impact across the first three months; point estimates from the main model (black) are accompanied by bootstrap estimates (blue, brown). (D) Predicted change in prevalence attributable to anthropogenic climate change in the recent past (real historical climate given in blue; counterfactual without anthropogenic warming in grey) and in the future for low (blue: SSP1-RCP2.6), intermediate (pink: SSP2-RCP4.5), and high (green: SSP5-RCP8.5) emissions scenarios. Thick lines are the median estimates across all 10,000 simulations; shading indicates the 5<sup>th</sup> and 95<sup>th</sup> percentiles of this distribution, and is truncated at the lower axis limits for visualization purposes only (the full interval is shown in Figure S5A). Historical estimates are shown relative to an average baseline across 1901 to 1930. Future estimates are shown relative to a baseline across 2015 to 2019, added to the end-of-historical baseline (2010 to 2014). Years with incomplete predictions due to lag effects (1901 and 2015) are not displayed.

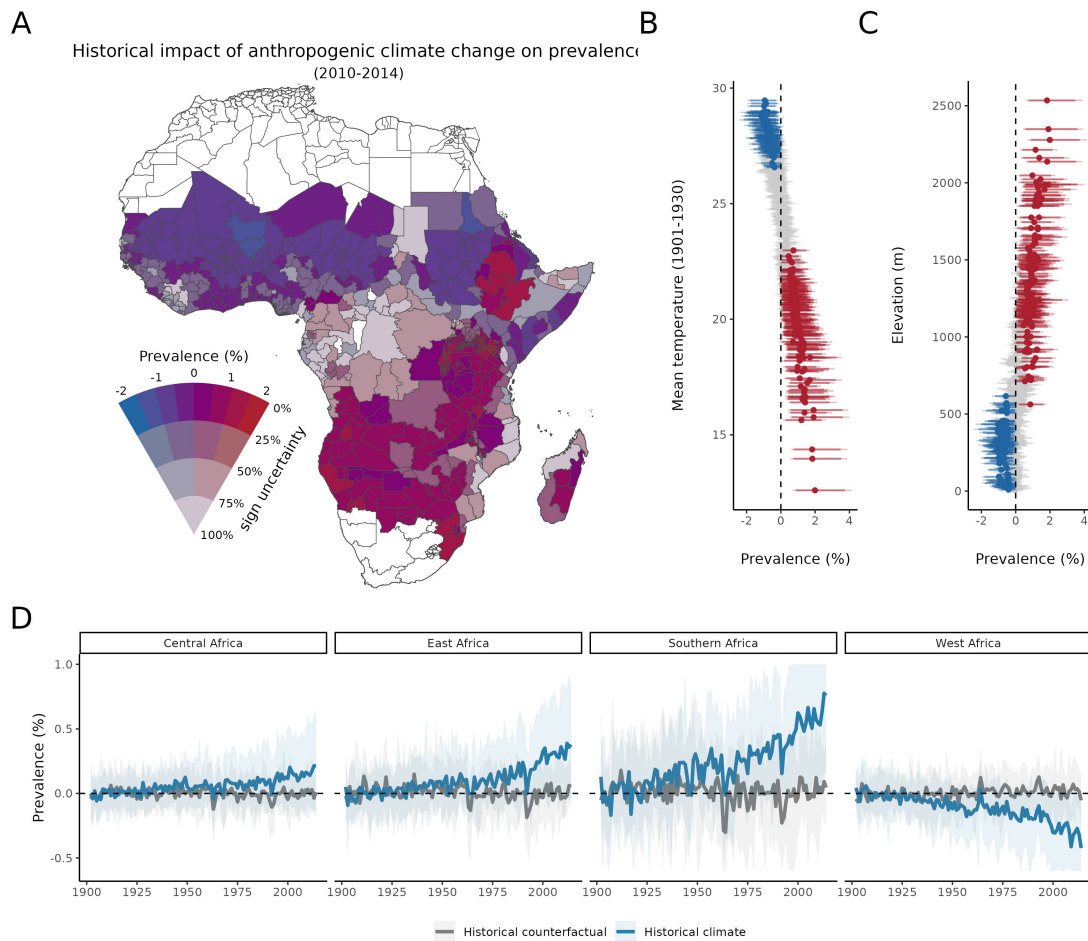

**Figure 3: Historical changes in malaria prevalence attributable to anthropogenic climate change from 1901 to 2014.** (A) Estimated change in prevalence attributable to anthropogenic climate change in each administrative unit, based on the difference between the historical climate in 2010-2014 and a counterfactual scenario for the same period simulated without anthropogenic warming. Sign uncertainty is the percentage of the 10,000 simulations that estimate an increase (for positive point estimates) or decrease (for negative point estimates) in prevalence due to anthropogenic climate change. An uncertainty of 0% implies that all models predict a positive or negative trend, while an uncertainty close to 100% indicates a near-even split of simulations showing an increase or decrease in prevalence. (B) Estimated change in prevalence attributable to anthropogenic climate change (difference between factual and counterfactual scenario in 2010-2014) in each administrative polygon, compared to the baseline mean temperature at the start of the 20<sup>th</sup> century (averaged over 1901-1930); error bars indicate both 90% (thicker lines) and 95% (thinner lines) confidence intervals. Points and lines are colored based on the 90% confidence interval: blue for negative effects, red for positive effects, and grey for non-significant effects. (C) Estimated change in prevalence attributable to anthropogenic climate change in each administrative polygon, compared to average elevation; error bars indicate both 90% and 95% confidence intervals, colored as in (B). (D) Predicted historical changes in prevalence by year, broken down by region. As in Figure 2, predictions based on true historical climate (blue) are compared to counterfactual predictions without anthropogenic warming (grey), relative to a 1901 to 1930 baseline. Thick lines are the median estimate across all 10,000 simulations; for visualization purposes, shading indicates the 90% confidence interval, and is truncated at the upper and lower axis limits. Plots begin in 1902 with the first full year of predictions (due to lag effects).

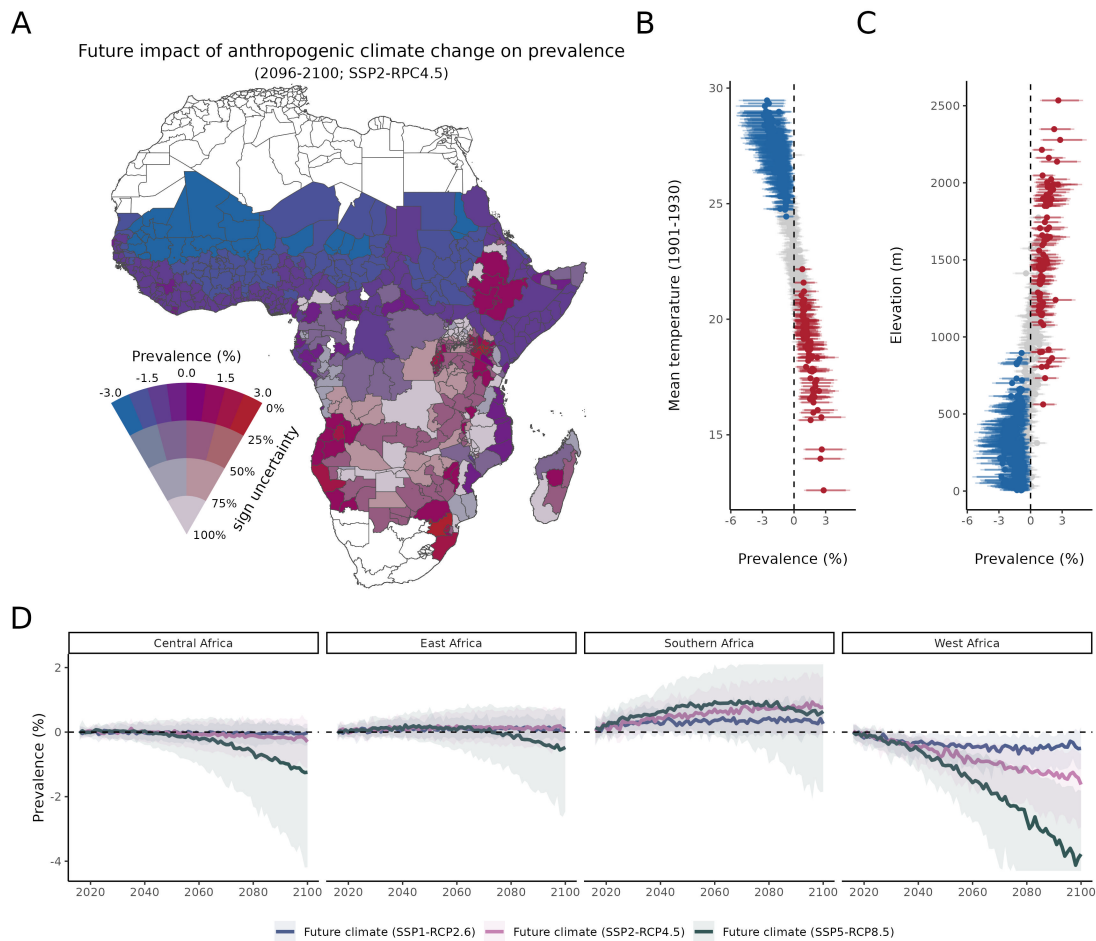

**Figure 4: Projected future changes in malaria prevalence driven by climate change from 2015 to 2100.** (A) Projected climate-driven changes in prevalence by the end of the century (2096-2100), compared to the present day (2015-2020), for an intermediate emissions scenario (SSP2-RCP4.5). Sign uncertainty is the percentage of the 10,000 simulations that estimate an increase (for positive point estimates) or decrease (for negative point estimates) in prevalence due to future climate change. An uncertainty of 0% implies that all models predict a positive or negative trend, while an uncertainty close to 100% indicates a near-even split of simulations showing an increase or decrease in prevalence. (B) Projected change in prevalence due to climate change by the end of the century (2096-2100) in each administrative polygon, estimated for SSP2-RCP4.5, compared to the baseline mean temperature at the start of the 20<sup>th</sup> century; error bars indicate both 90% (thicker lines) and 95% (thinner lines) confidence intervals. Points and lines are colored based on the 90% confidence interval: blue for negative effects, red for positive effects, and grey for non-significant effects. (C) Projected change in prevalence due to climate change by the end of the century (2096-2100) in each administrative polygon, estimated for SSP2-RCP4.5, compared to average elevation; error bars indicate both 90% and 95% confidence intervals, colored as in (B). (D) Projected changes in prevalence by year across all scenarios by region. Projections are given relative to the mean from 2015-2019, and as in Figure 2, and line color indicates scenario (blue: SSP1-RCP2.6; pink: SSP2-RCP4.5; green: SSP5-RCP8.5). Thick lines are the median estimate across all 10,000 simulations; for visualization purposes, shading indicates the 90% confidence interval, and is truncated at the upper and lower axis limits. Plots begin in 2016 with the first full year of predictions (due to lag effects).

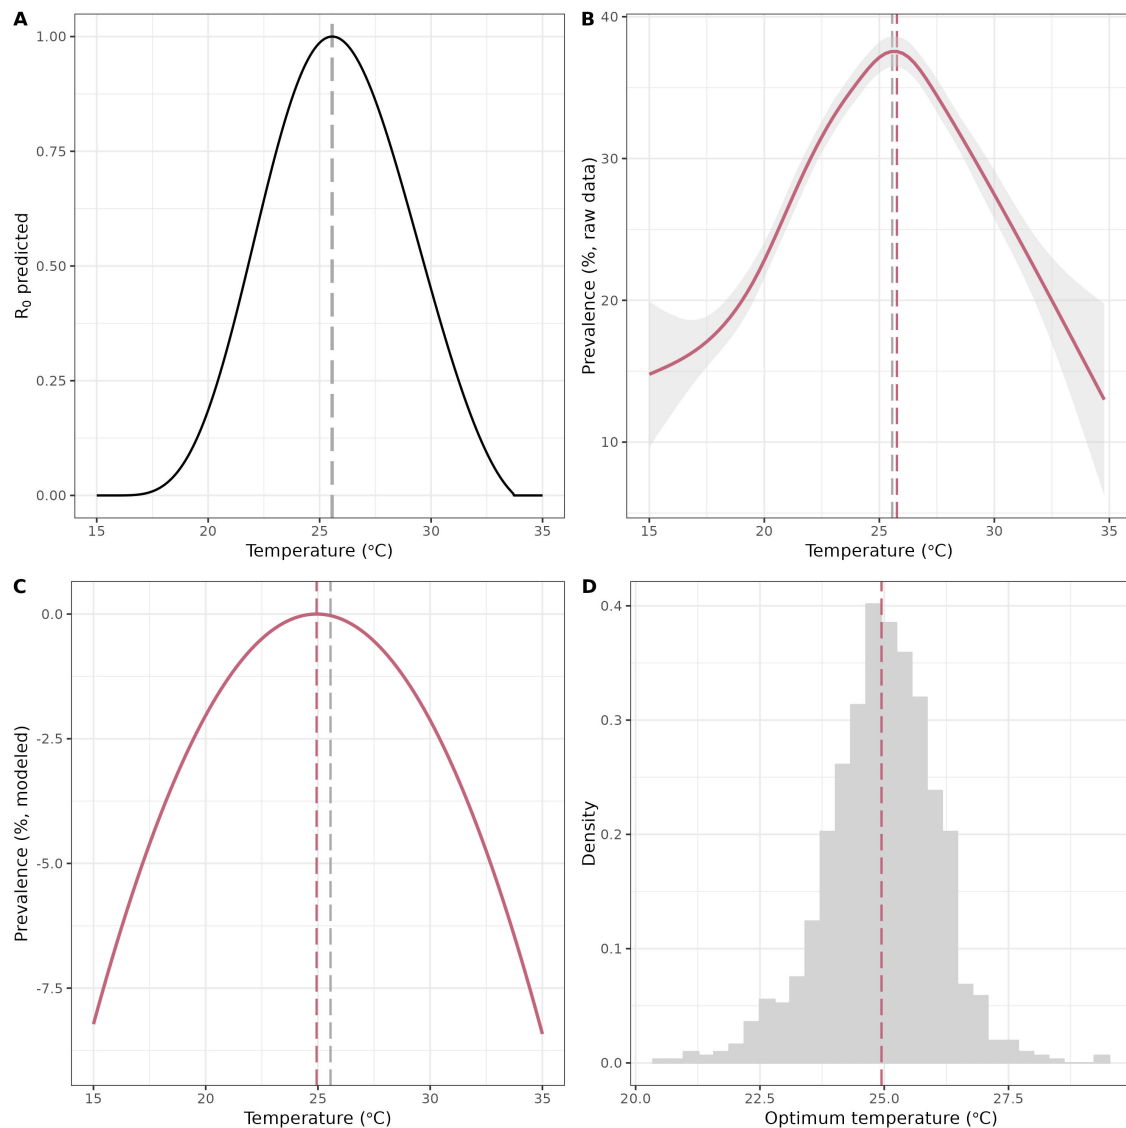

**Figure S1: Malaria prevalence follows biological expectations.** (A) The theoretical expectation for  $R_0(T)$ , the scaled partial response of the basic reproduction number to temperature, estimated based on laboratory experiments (black line)<sup>6</sup>. Transmission peaks around an estimated optimum of 25.6 °C (grey dashed line). (B) Observed malaria prevalence data from Snow *et al.*<sup>4</sup> matched to monthly temperature from CRU weather station data, summarized and smoothed using a generalized additive model. The observed optimum temperature (red dashed line) closely matches expectations based on laboratory experiments (grey dashed line). (C) Main panel regression estimate for prevalence response to temperature (also shown in Figure 2A). The modeled optimum temperature (red dashed line) is slightly lower than in laboratory experiments (grey dashed line). (D) Histogram of optimum temperatures derived from 1,000 bootstrapped estimates of the panel regression model shown in panel (C). The mean optimum temperature across all bootstrap samples (red dashed line) is identical to the optimum shown in panel C.

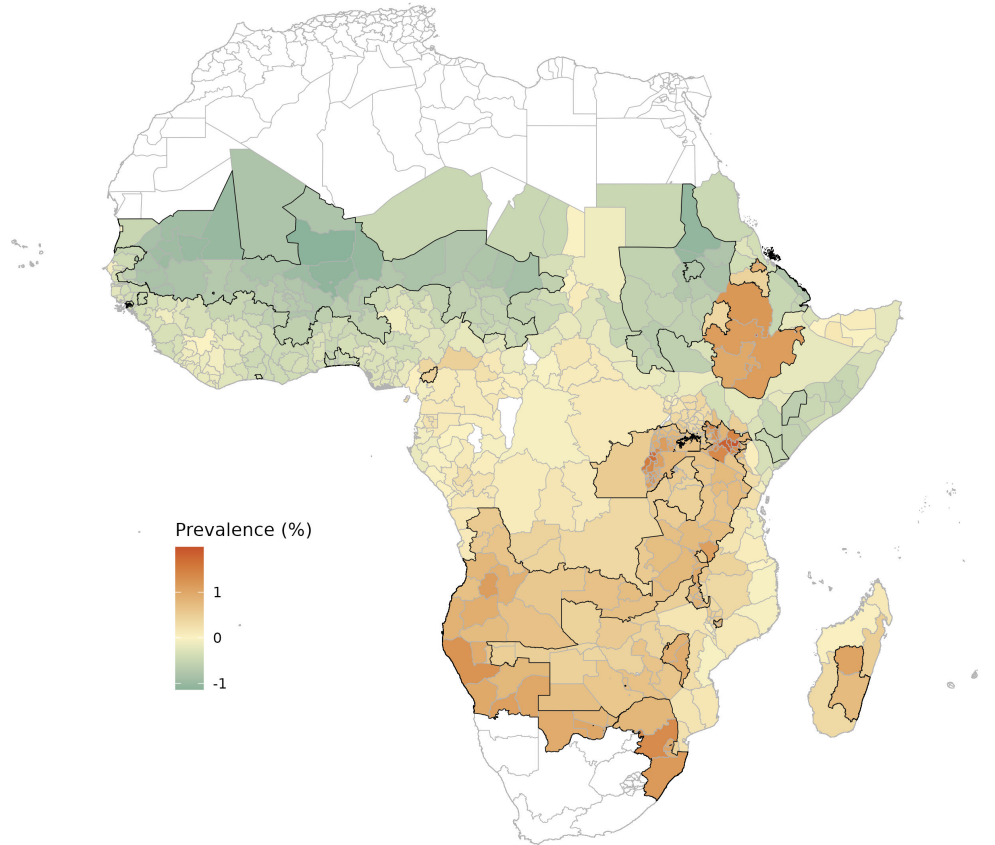

**Figure S2: Historical changes in malaria prevalence attributable to anthropogenic climate change from 1901 to 2014.** Map shows the estimated change in prevalence attributable to anthropogenic climate change in each administrative unit, based on the difference between the historical climate in 2010-2014 and a counterfactual scenario for the same period simulated without anthropogenic warming. Polygons with a black solid outline indicate areas with changes that were statistically significant ( $\alpha = 0.05$ ) based on the sign of 10,000 bootstrapped simulations. Mean estimates shown here provide the same information as in Figure 3, but on a single color scale (*i.e.*, no uncertainty visualization).

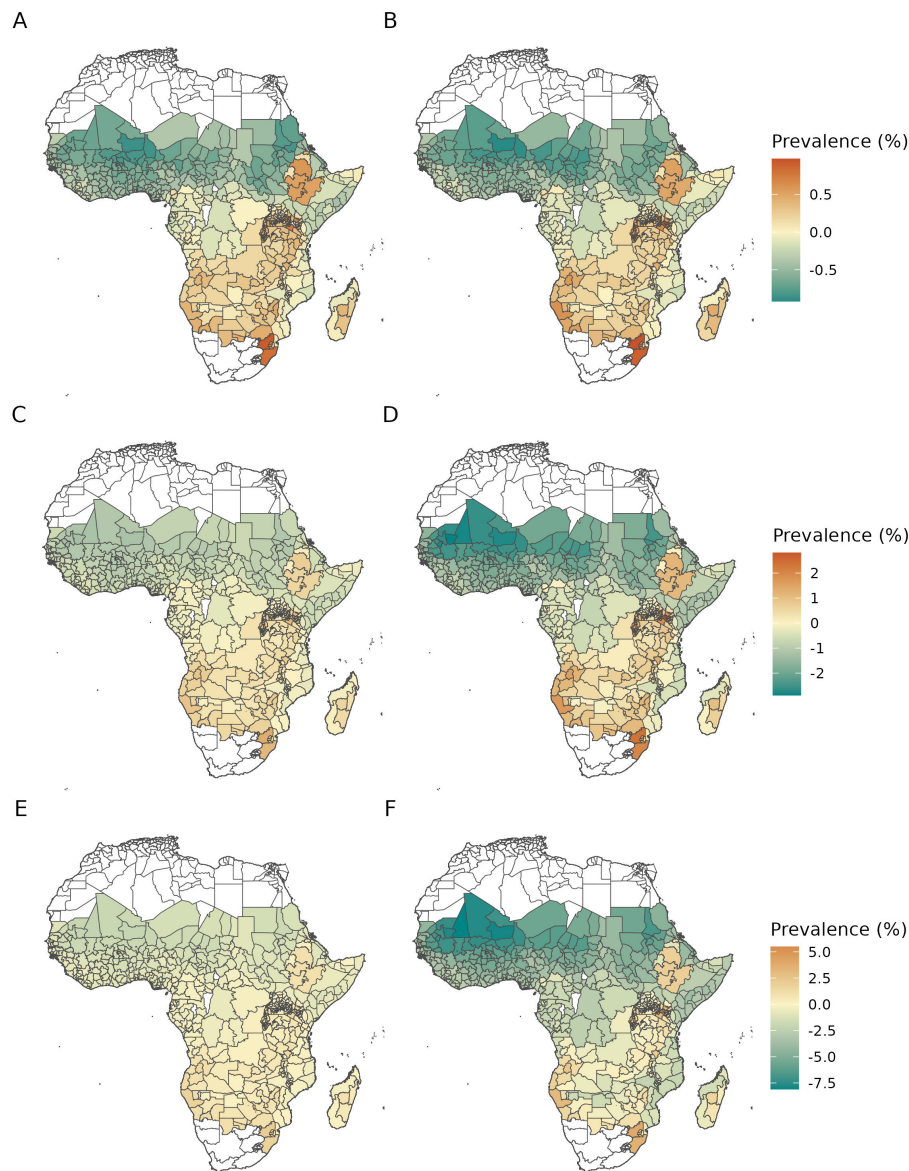

**Figure S3: Projected future changes in malaria prevalence driven by climate change from 2015 to 2100.** Maps show the estimated change in prevalence due to anthropogenic climate change (in percentage points) in low-emissions (SSP1-RCP2.6; A,B), moderate-emissions (SSP2-RCP4.5; C,D), and high-emissions (SSP5-RCP8.5; E,F) scenarios, projected to mid-century (2048-2052; A,C,E) or the end of the century (2096-2100; B,D,F). Projections are reported as differences relative to a present-day baseline (2015-2019). Mean estimates in panel D provide the same information as in Figure 4, but on a single color scale (*i.e.*, no uncertainty visualization).

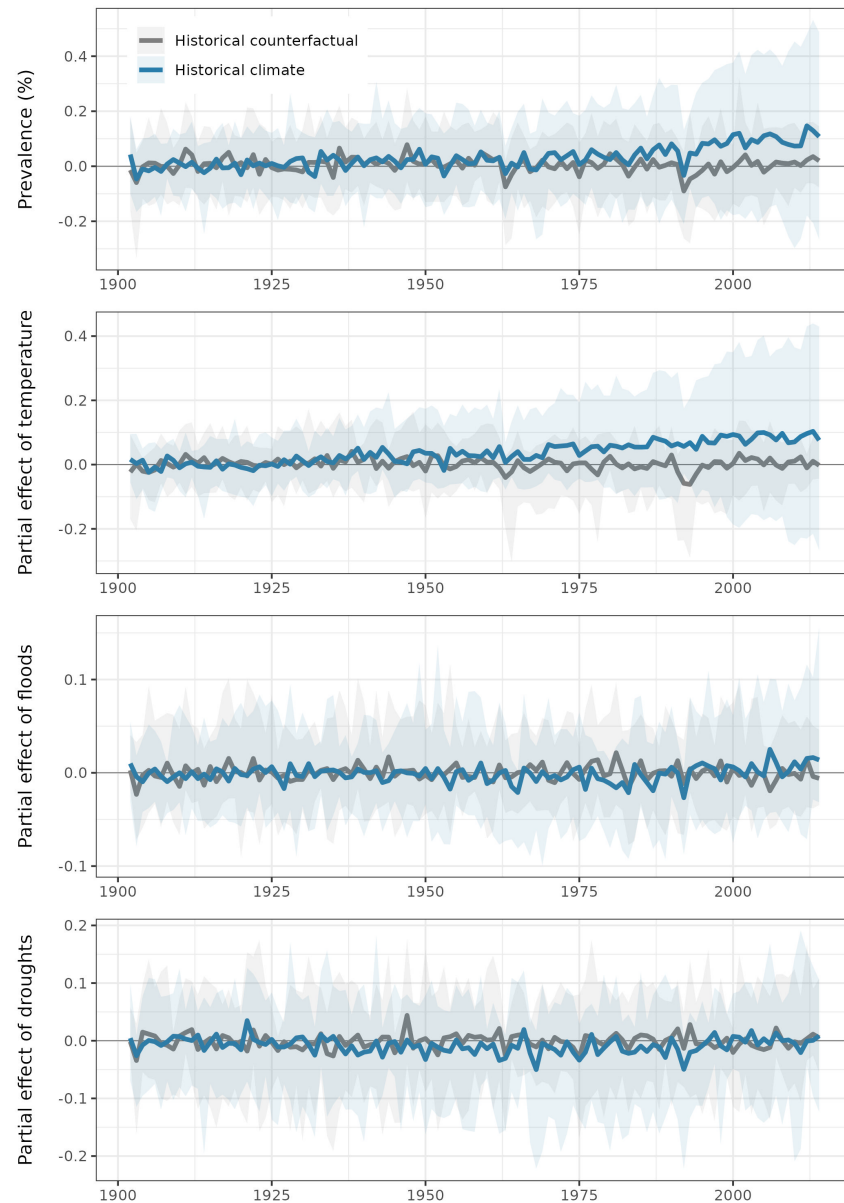

Figure S4: **Historical impacts of climate change decomposed by variable.** Partial predictions of changes in malaria attributable to anthropogenic climate change are made based on all climate variables (top row), temperature (second row), flood shocks (third row), and drought shocks (fourth row). As in Figure 2, predictions based on true historical climate (blue) are compared to counterfactual predictions without anthropogenic warming (grey), relative to a 1901 to 1930 baseline. Thick lines are the median estimate across all 10,000 simulations; shading indicates the 5<sup>th</sup> and 95<sup>th</sup> percentiles. Plots begin in 1902 with the first full year of predictions (due to lag effects).



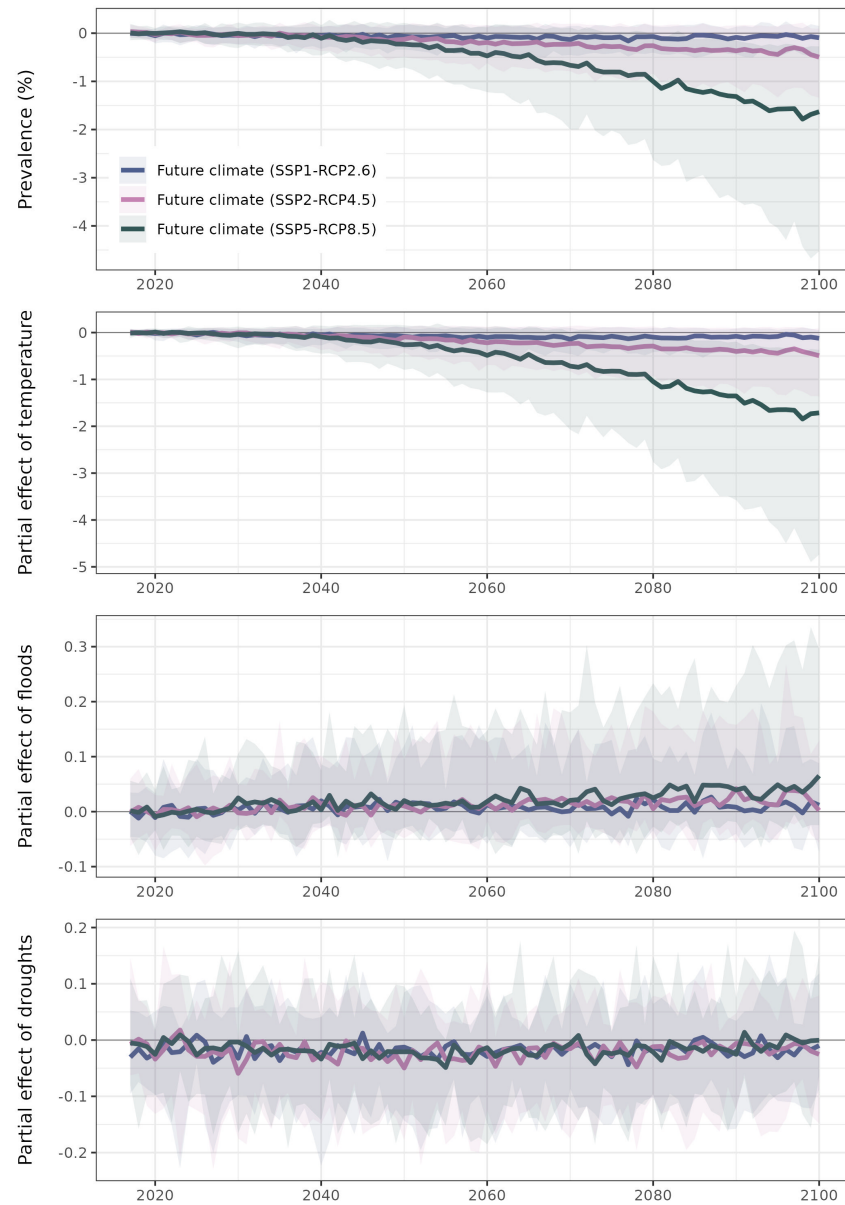

Figure S5: **Future impacts of climate change decomposed by variable.** Partial predictions of changes in malaria attributable to future climate change are made based on all climate variables (top row) temperature (second row), flood shocks (third row), and drought shocks (fourth row). Projections are shown relative to the mean prevalence from 2015-2020, and as in Figure 2, line color indicates emissions scenario (blue: SSP1-RCP2.6; pink: SSP2-RCP4.5; green: SSP5-RCP8.5). Thick lines are the median estimate across all 10,000 simulations; shading indicates the 5<sup>th</sup> and 95<sup>th</sup> percentiles. Plots begin in 2016 with the first full year of predictions (due to lag effects).

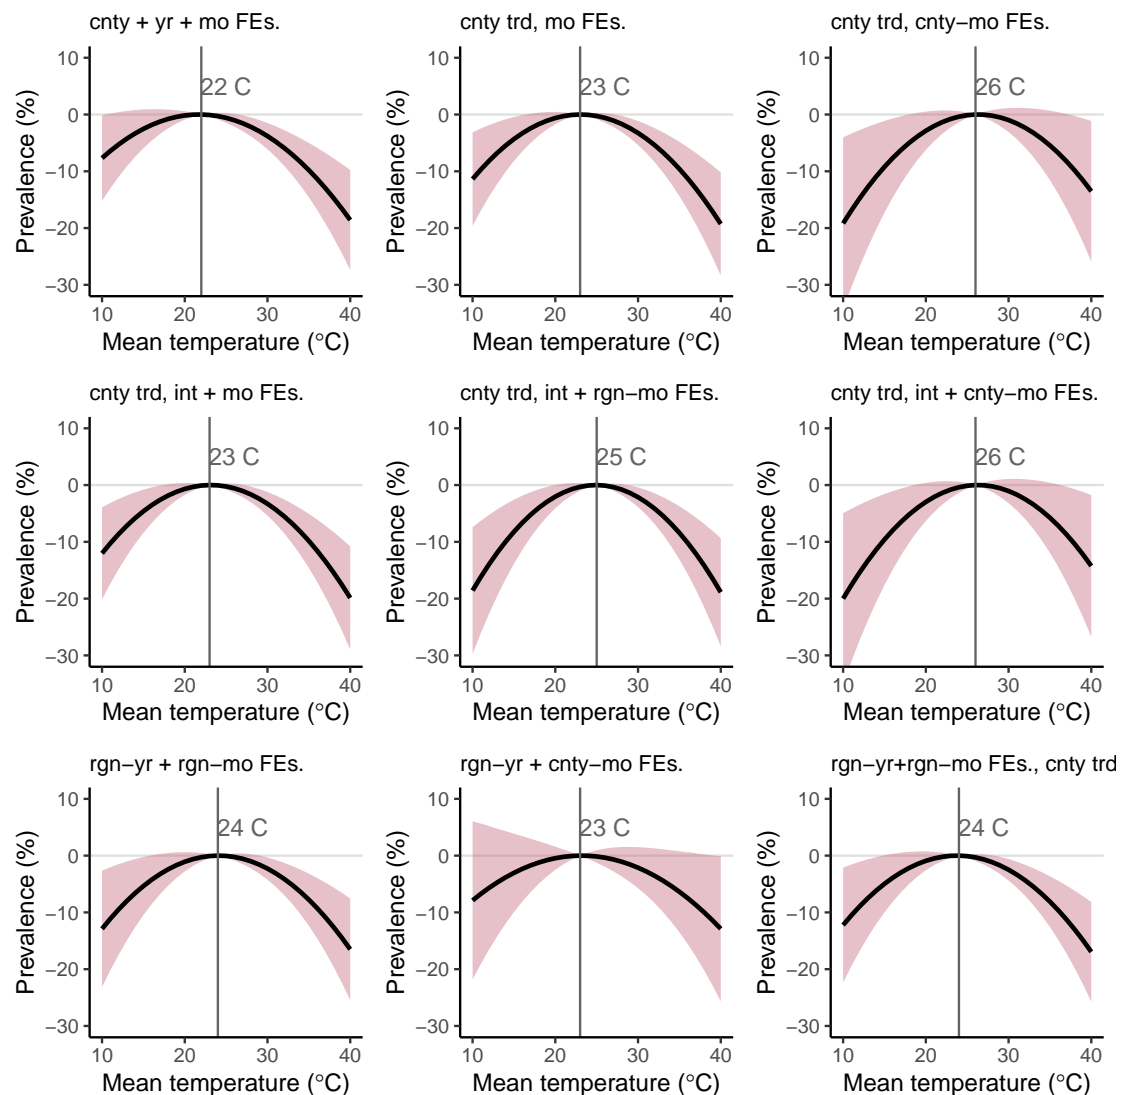

**Figure S6: Sensitivity of the  $PfPR_{2-10}$ -temperature relationship to alternative spatiotemporal controls.** All panels show the estimated relationship between malaria prevalence for children aged 2-10 and monthly average temperature and all include fixed effects (i.e., dummy variables) at the scale of the first administrative unit (i.e., ADM1). All temperature responses are plotted relative to the model-specific temperature at which prevalence is maximized; this peak temperature is indicated in grey text and with a vertical grey line in each panel. From top-left to bottom-right, model controls are: country, year, and month fixed effects; country-specific quadratic time trends and month fixed effects; country-specific quadratic time trends and country-by-month fixed effects; country-specific quadratic time trends and intervention period and month fixed effects; country-specific quadratic time trends and intervention period and region-by-month fixed effects; country-specific quadratic time trends and intervention period and country-by-month fixed effects; region-by-year and region-by-month fixed effects; region-by-year and country-by-month fixed effects; and region-by-year and region-by-month fixed effects and country-specific linear time trends. The preferred specification used throughout the main text is the center panel, which includes country-specific quadratic time trends and intervention period and region-by-month fixed effects. In all panels, “region” refers to the Global Burden of Disease regional definitions of western, southern, central, and eastern Africa. All standard errors are clustered at the first administrative unit (e.g., province) level.

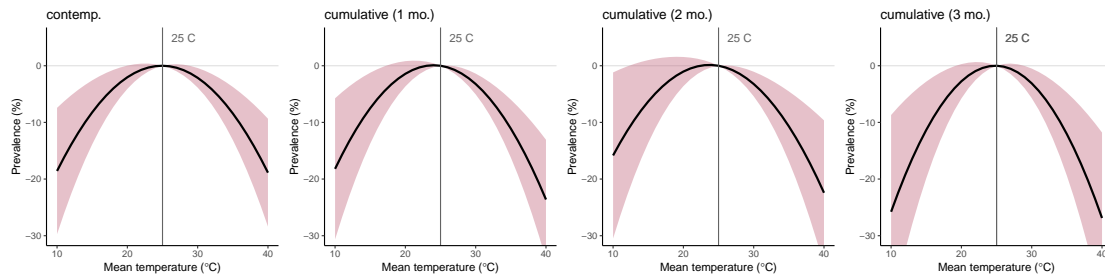

Figure S7: **Cumulative effect of contemporaneous and lagged temperature on  $PfPR_{2-10}$ .** All panels show the estimated relationship between malaria prevalence for children aged 2-10 and monthly average temperature and are plotted relative to a monthly average temperature of 25°C. The first panel shows the effect of monthly average temperature on the same month's average prevalence (this is the main estimate used throughout the main text). The second panel shows the cumulative effect of contemporaneous temperature and the prior month's temperature on prevalence, while the last two columns show analogous results for two and three months of lags, respectively. In all specifications, three months of lagged precipitation extremes are included, as well as all other controls shown in Equation 1. All standard errors are clustered at the first administrative unit (e.g., province) level.

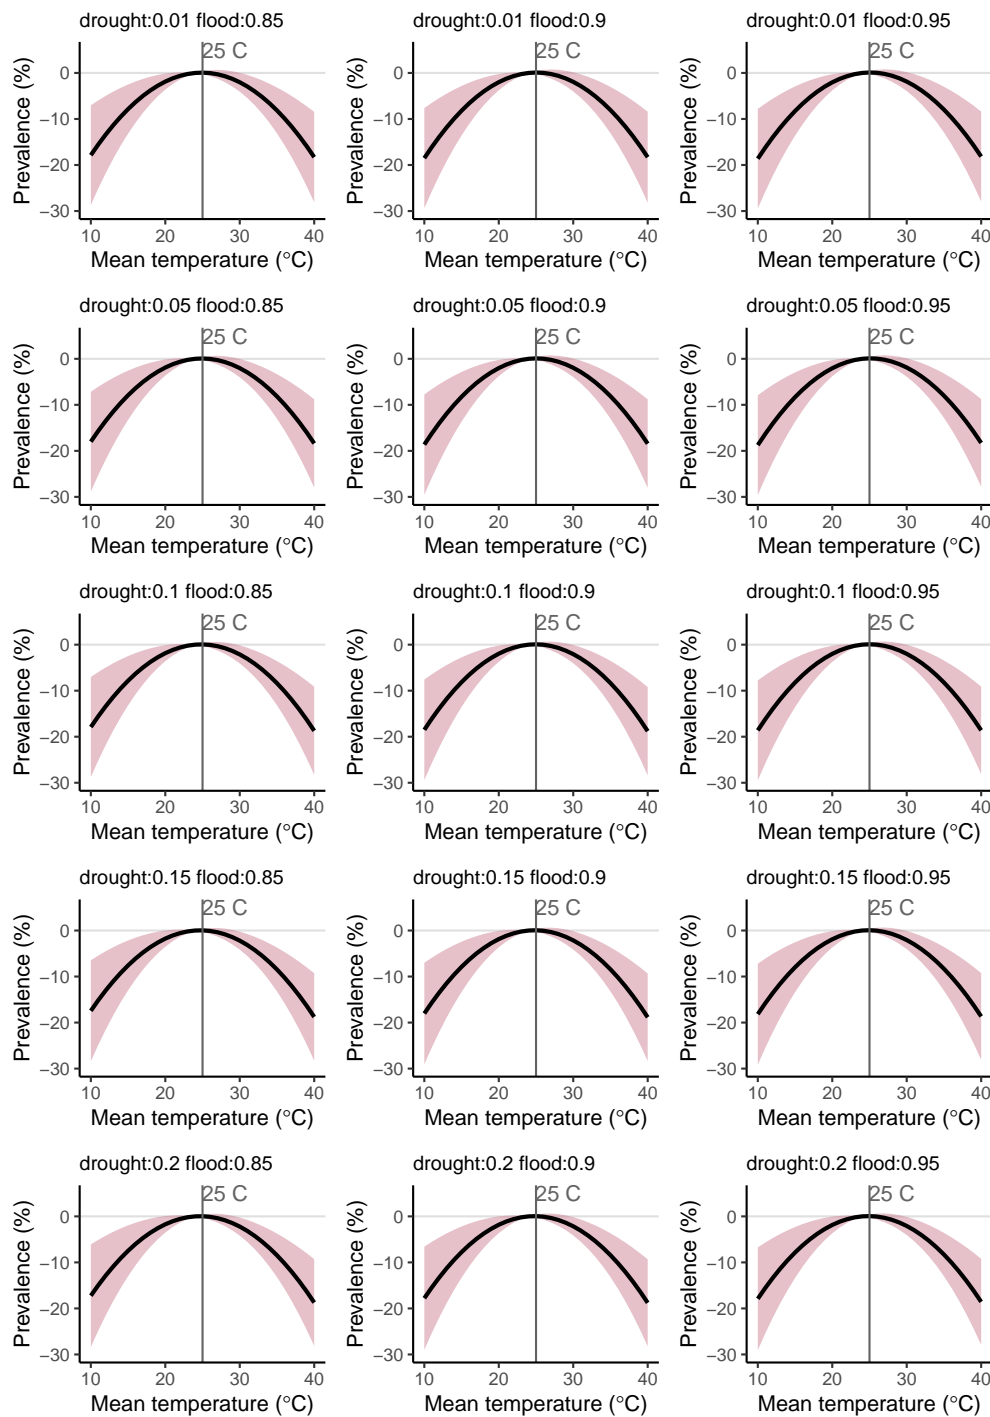

Figure S8: **Sensitivity of  $PfPR_{2-10}$ -temperature relationship to alternative drought and flood definitions.** All panels show the estimated relationship between malaria prevalence for children aged 2-10 and monthly average temperature and are plotted relative to a monthly average temperature of 25°C. Cutoff values for drought and flood definitions are given in the titles of each panel. For example, the first panel in the upper left defines drought as monthly total precipitation that falls below 1% of the long-run location- and month-specific mean, and defines flood as monthly total precipitation that falls above 85% of the long-run location- and month-specific mean. In all specifications, three months of lagged precipitation extremes are included, as well as all other controls shown in Equation 1. The main specification used throughout the paper uses a drought cutoff of 10% and a flood cutoff of 90%. All standard errors are clustered at the first administrative unit (e.g., province) level.

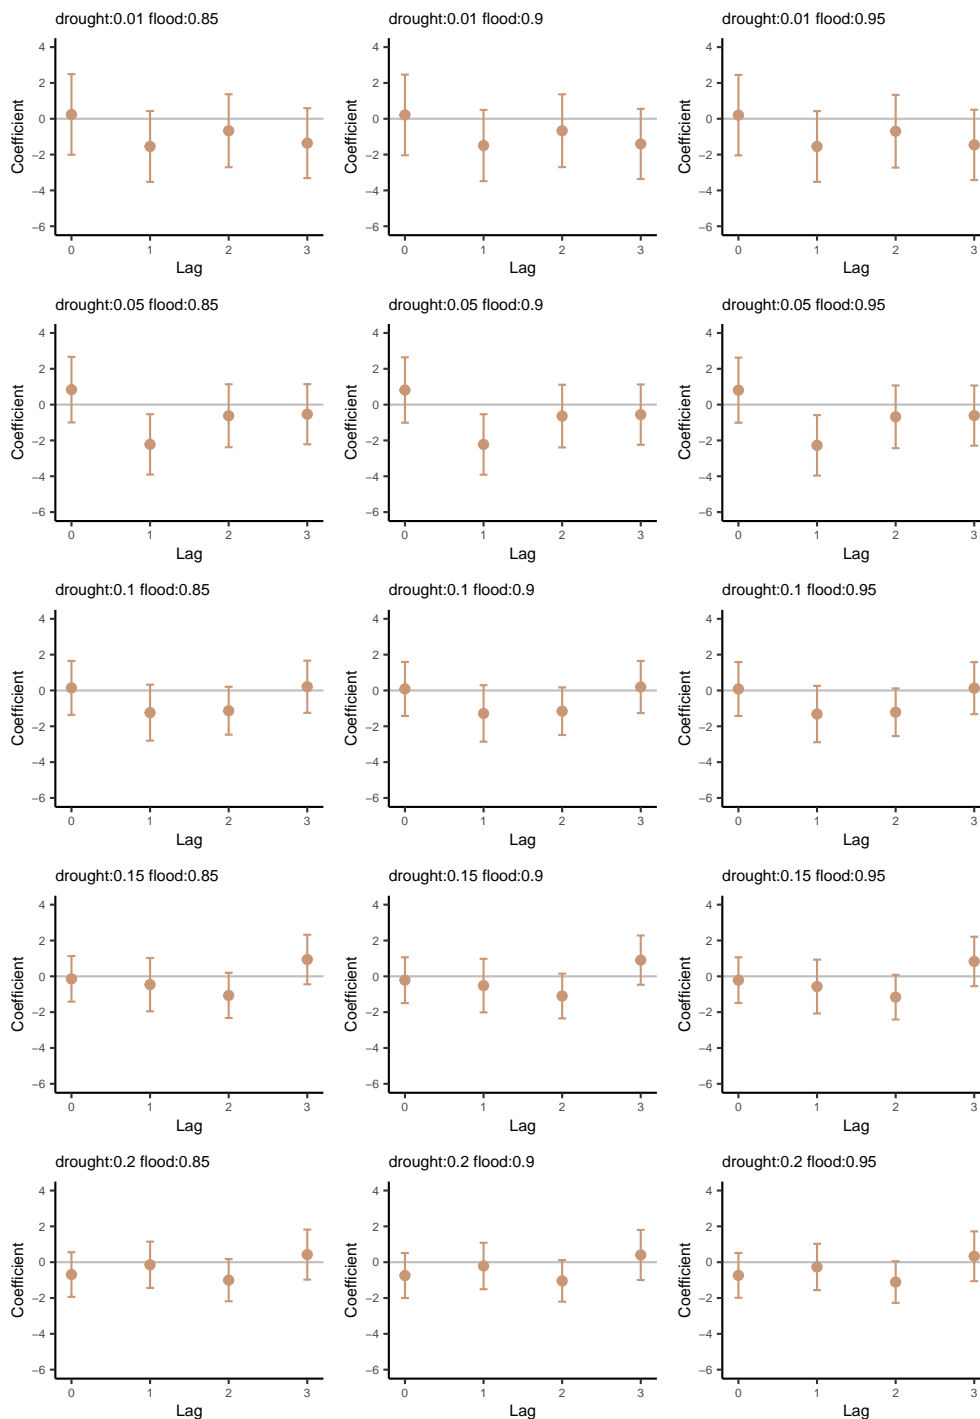

Figure S9: **Sensitivity of  $PfPR_{2-10}$ -drought relationship to alternative drought and flood definitions.** All panels show the estimated relationship between malaria prevalence for children aged 2-10 and contemporaneous and lagged drought events. Point estimates are given by solid circles, while vertical bars indicate 95% confidence intervals. Cutoff values for drought and flood definitions are given in the titles of each panel. For example, the first panel in the upper left defines drought as monthly total precipitation that falls below 1% of the long-run location- and month-specific mean, and defines flood as monthly total precipitation that falls above 85% of the long-run location- and month-specific mean. In all specifications, three months of lagged precipitation extremes are included, as well as all other controls shown in Equation 1. The main specification used throughout the paper uses a drought cutoff of 10% and a flood cutoff of 90%. All standard errors are clustered at the first administrative unit (e.g., province) level.

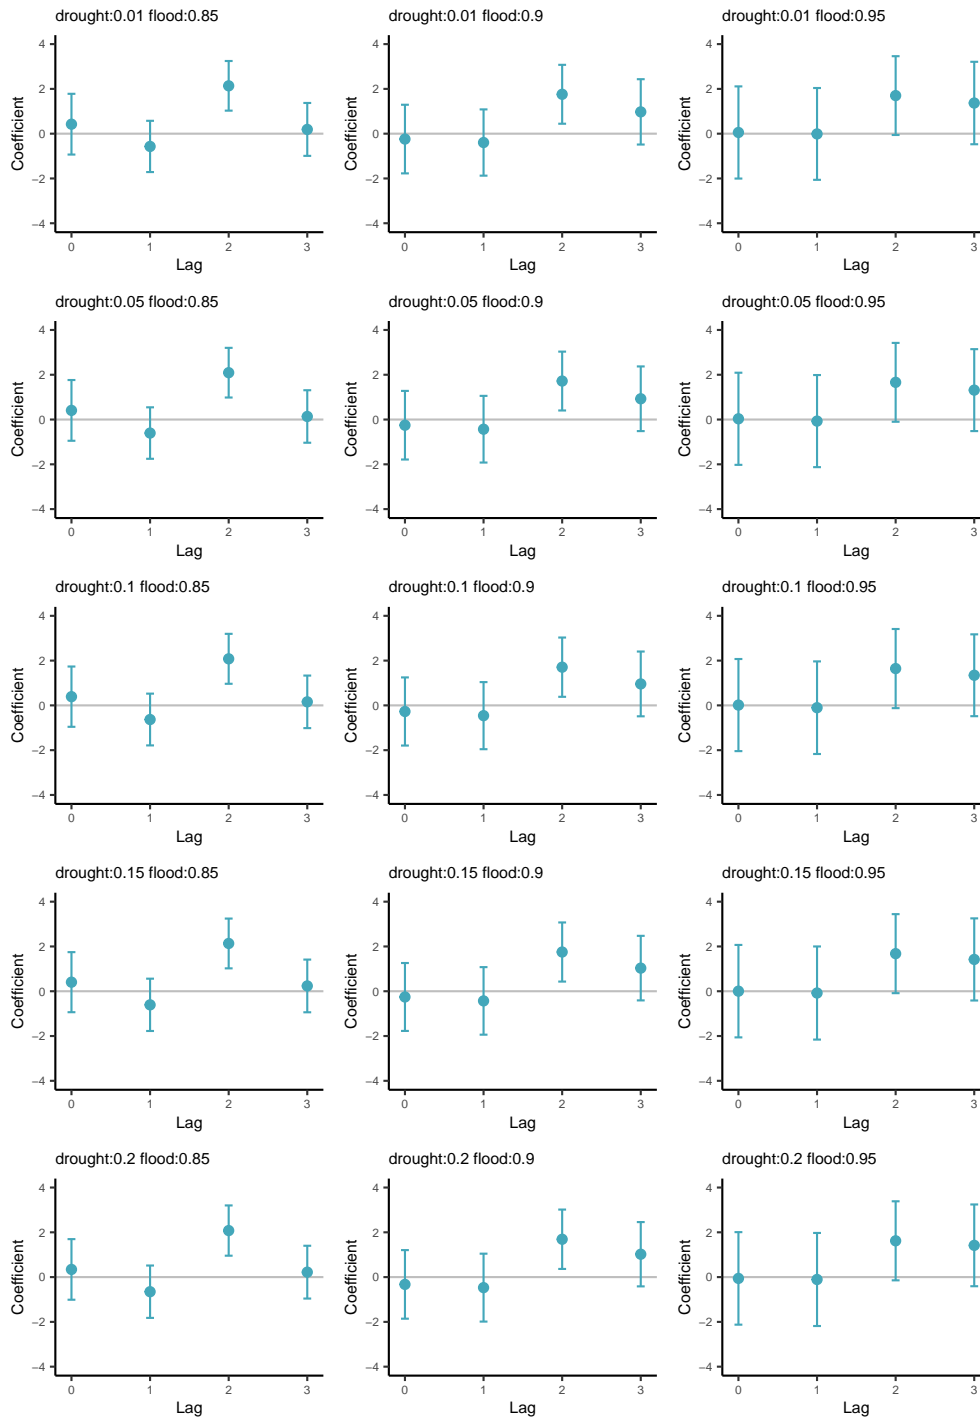

Figure S10: **Sensitivity of  $PfPR_{2-10}$ -flood relationship to alternative drought and flood definitions.** All panels show the estimated relationship between malaria prevalence for children aged 2-10 and contemporaneous and lagged flood events. Point estimates are given by solid circles, while vertical bars indicate 95% confidence intervals. Cutoff values for drought and flood definitions are given in the titles of each panel. For example, the first panel in the upper left defines drought as monthly total precipitation that falls below 1% of the long-run location- and month-specific mean, and defines flood as monthly total precipitation that falls above 85% of the long-run location- and month-specific mean. In all specifications, three months of lagged precipitation extremes are included, as well as all other controls shown in Equation 1. The main specification used throughout the paper uses a drought cutoff of 10% and a flood cutoff of 90%. All standard errors are clustered at the first administrative unit (e.g., province) level.

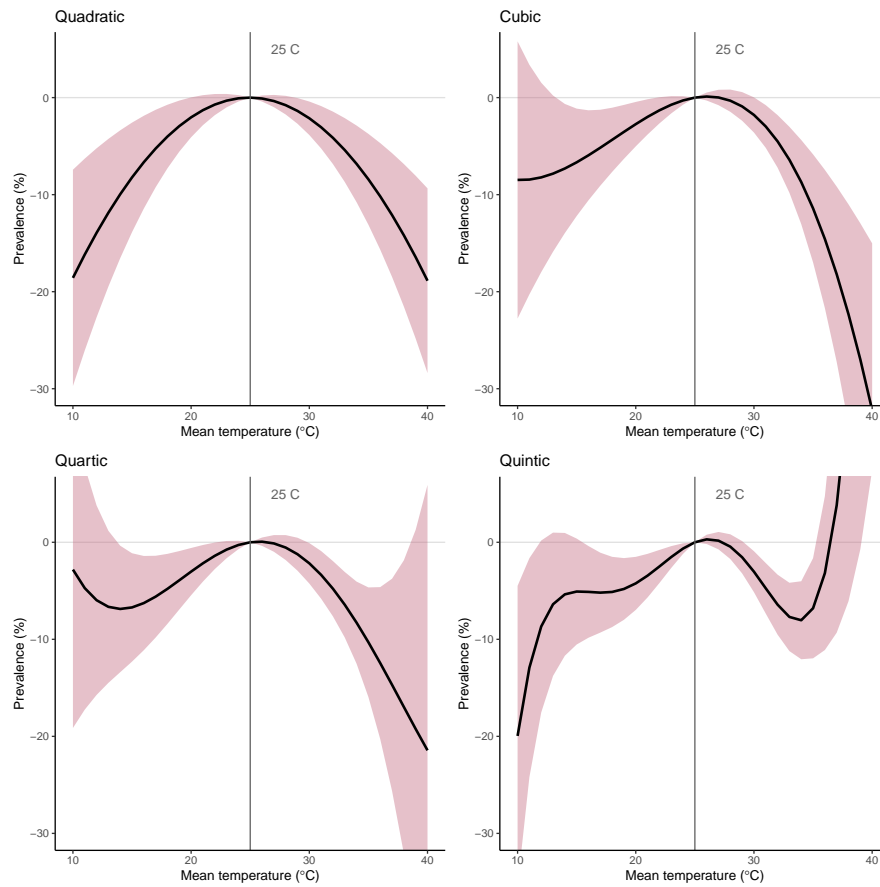

Figure S11: **Alternative functional forms for the  $PfPR_{2-10}$ -temperature relationship.** All panels show the estimated relationship between malaria prevalence for children aged 2-10 and monthly average temperature and are plotted relative to a monthly average temperature of 25°C. Starting in the upper left, the first panel shows the paper's main specification, a quadratic functional form for the prevalence-temperature relationship. The second panel shows a cubic functional form, the third a quartic, and the fourth a quintic. All standard errors are clustered at the first administrative unit (e.g., province) level.

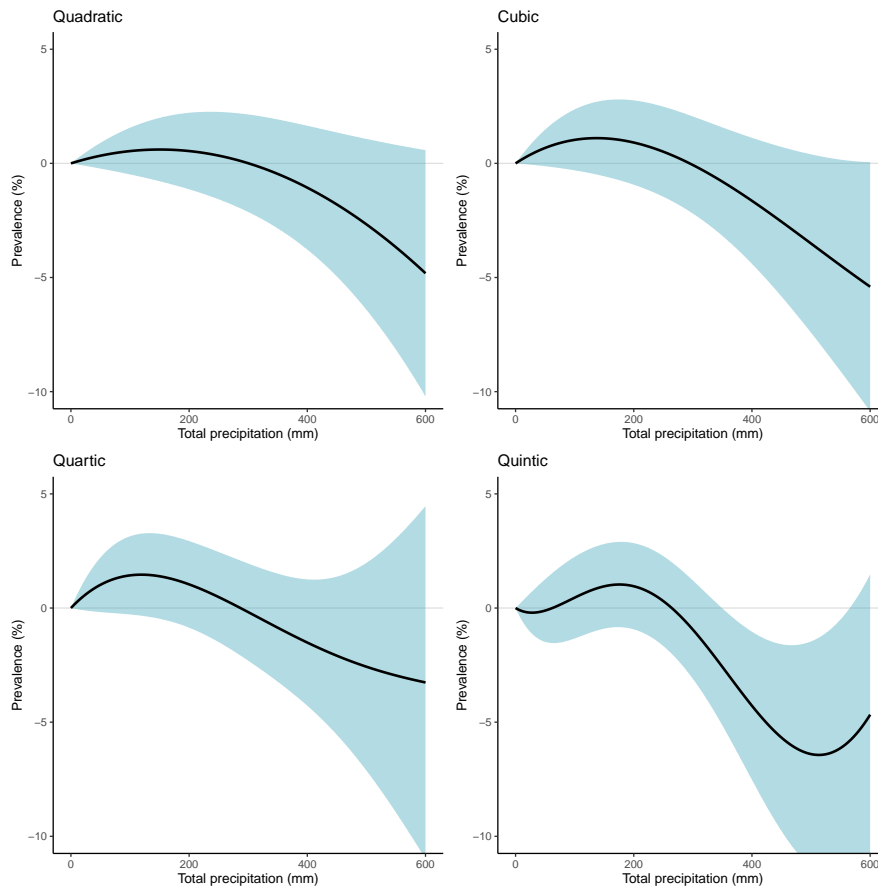

Figure S12: **Non-linearities in the  $PfPR_{2-10}$ -precipitation relationship.** All panels show the estimated relationship between malaria prevalence for children aged 2-10 and monthly cumulative precipitation and are plotted relative to a month with no rainfall. All relationships are estimated for contemporaneous monthly precipitation. All standard errors are clustered at the first administrative unit (e.g., province) level.



| Region                                 | Scenario    | 2048-2052 |                  | 2096-2100 |                  |
|----------------------------------------|-------------|-----------|------------------|-----------|------------------|
|                                        |             | Estimate  | 95% CI           | Estimate  | 95% CI           |
| Sub-Saharan Africa<br>(continent-wide) | SSP1-RCP2.6 | -0.0856   | (-0.411, 0.169)  | -0.0942   | (-0.497, 0.160)  |
|                                        | SSP2-RCP4.5 | -0.148    | (-0.570, 0.204)  | -0.433    | (-1.371, 0.249)  |
|                                        | SSP5-RCP8.5 | -0.244    | (-0.803, 0.261)  | -1.89     | (-4.846, -0.065) |
| East Africa                            | SSP1-RCP2.6 | 0.112     | (-0.179, 0.466)  | 0.0984    | (-0.248, 0.449)  |
|                                        | SSP2-RCP4.5 | 0.131     | (-0.268, 0.543)  | 0.131     | (-0.577, 0.846)  |
|                                        | SSP5-RCP8.5 | 0.157     | (-0.371, 0.688)  | -0.603    | (-2.715, 0.951)  |
| Central Africa                         | SSP1-RCP2.6 | -0.0346   | (-0.354, 0.205)  | -0.0605   | (-0.430, 0.242)  |
|                                        | SSP2-RCP4.5 | -0.0212   | (-0.471, 0.385)  | -0.231    | (-1.192, 0.514)  |
|                                        | SSP5-RCP8.5 | -0.109    | (-0.690, 0.444)  | -1.43     | (-4.361, 0.371)  |
| Southern Africa                        | SSP1-RCP2.6 | 0.321     | (-0.094, 0.836)  | 0.339     | (-0.062, 0.925)  |
|                                        | SSP2-RCP4.5 | 0.507     | (-0.055, 1.104)  | 0.844     | (-0.185, 1.940)  |
|                                        | SSP5-RCP8.5 | 0.846     | (-0.079, 1.810)  | 0.492     | (-2.313, 2.547)  |
| West Africa                            | SSP1-RCP2.6 | -0.448    | (-0.952, -0.135) | -0.449    | (-1.087, 0.065)  |
|                                        | SSP2-RCP4.5 | -0.694    | (-1.290, -0.232) | -1.51     | (-3.045, -0.481) |
|                                        | SSP5-RCP8.5 | -1.04     | (-1.860, -0.358) | -4.25     | (-8.780, -1.519) |

Table S1: **Projected future impacts of climate change on  $PfPR_{2-10}$ .** Estimates and confidence intervals are all given as percentage point changes from a 2015-2020 baseline, estimated across 10,000 simulations.

|                         | <i>Dependent variable:</i>    |                             |                                  |                                   |                                       |                                 |                                |                                 |                                        |
|-------------------------|-------------------------------|-----------------------------|----------------------------------|-----------------------------------|---------------------------------------|---------------------------------|--------------------------------|---------------------------------|----------------------------------------|
|                         | $PfPR_{2-10}$                 |                             |                                  |                                   |                                       |                                 |                                |                                 |                                        |
|                         | city + yr<br>+ mo FEs.<br>(1) | city trd,<br>mo FEs.<br>(2) | city trd,<br>city-mo FEs.<br>(3) | city trd,<br>int + mo FEs.<br>(4) | city trd,<br>int + rgn-mo FEs.<br>(5) | city trd,<br>rgn-mo FEs.<br>(6) | rgn-yr +<br>rgn-mo FEs.<br>(7) | rgn-yr +<br>city-mo FEs.<br>(8) | rgn-yr+rgn-mo FEs.,<br>city trd<br>(9) |
| Avg temp. (°C)          | 2.42***<br>(0.83)             | 3.08***<br>(0.88)           | 3.80***<br>(1.39)                | 3.23***<br>(0.87)                 | 4.15***<br>(1.08)                     | 3.97***<br>(1.39)               | 3.13***<br>(1.00)              | 2.11<br>(1.34)                  | 3.06***<br>(0.99)                      |
| Avg temp.2 (°C)         | -0.06***<br>(0.02)            | -0.07***<br>(0.02)          | -0.07***<br>(0.03)               | -0.07***<br>(0.02)                | -0.08***<br>(0.02)                    | -0.08***<br>(0.03)              | -0.07***<br>(0.02)             | -0.05*<br>(0.03)                | -0.06***<br>(0.02)                     |
| Flood                   | -0.76<br>(0.75)               | -0.37<br>(0.74)             | -0.73<br>(0.82)                  | -0.27<br>(0.74)                   | -0.27<br>(0.78)                       | -0.65<br>(0.82)                 | -0.88<br>(0.76)                | -1.15<br>(0.80)                 | -0.82<br>(0.74)                        |
| Flood (lag 1)           | -0.56<br>(0.73)               | -0.40<br>(0.76)             | -0.50<br>(0.85)                  | -0.46<br>(0.75)                   | -0.46<br>(0.76)                       | -0.55<br>(0.83)                 | -0.77<br>(0.73)                | -1.09<br>(0.80)                 | -0.57<br>(0.72)                        |
| Flood (lag 2)           | 1.68***<br>(0.65)             | 1.52***<br>(0.65)           | 2.03***<br>(0.72)                | 1.69***<br>(0.65)                 | 1.71**<br>(0.68)                      | 2.19***<br>(0.72)               | 2.13***<br>(0.68)              | 1.94***<br>(0.72)               | 1.79***<br>(0.67)                      |
| Flood (lag 3)           | 0.58<br>(0.69)                | 0.90<br>(0.71)              | 1.89**<br>(0.80)                 | 0.87<br>(0.71)                    | 0.96<br>(0.74)                        | 1.91**<br>(0.81)                | 0.08<br>(0.70)                 | 0.74<br>(0.77)                  | 0.38<br>(0.68)                         |
| Drought                 | 0.56<br>(0.81)                | 0.87<br>(0.74)              | -0.48<br>(0.82)                  | 0.84<br>(0.74)                    | 0.09<br>(0.77)                        | -0.57<br>(0.83)                 | -0.35<br>(0.81)                | -0.69<br>(0.86)                 | -0.13<br>(0.74)                        |
| Drought (lag 1)         | -1.01<br>(0.75)               | -1.02<br>(0.77)             | -1.39<br>(0.86)                  | -0.92<br>(0.78)                   | -1.28<br>(0.80)                       | -1.34<br>(0.86)                 | -1.62**<br>(0.76)              | -1.28<br>(0.85)                 | -1.33*<br>(0.77)                       |
| Drought (lag 2)         | -0.97<br>(0.68)               | -1.08*<br>(0.65)            | -0.88<br>(0.76)                  | -1.04<br>(0.65)                   | -1.16*<br>(0.68)                      | -0.95<br>(0.76)                 | -1.18*<br>(0.69)               | -0.85<br>(0.77)                 | -1.24*<br>(0.67)                       |
| Drought (lag 3)         | 0.06<br>(0.71)                | 0.16<br>(0.73)              | 0.36<br>(0.81)                   | 0.06<br>(0.73)                    | 0.19<br>(0.74)                        | 0.15<br>(0.80)                  | -0.06<br>(0.77)                | 0.11<br>(0.83)                  | -0.16<br>(0.75)                        |
| Intvn. 1955-69          |                               |                             |                                  |                                   | -4.80***<br>(1.27)                    | -5.01***<br>(1.35)              |                                |                                 |                                        |
| Intvn. 2000-15          |                               |                             |                                  |                                   | -3.35**<br>(1.61)                     | -3.88**<br>(1.64)               |                                |                                 |                                        |
| Observations            | 9,875                         | 9,875                       | 9,875                            | 9,875                             | 9,875                                 | 9,875                           | 9,875                          | 9,875                           | 9,875                                  |
| R <sup>2</sup>          | 0.52                          | 0.52                        | 0.56                             | 0.53                              | 0.53                                  | 0.57                            | 0.56                           | 0.60                            | 0.59                                   |
| Adjusted R <sup>2</sup> | 0.48                          | 0.49                        | 0.51                             | 0.49                              | 0.49                                  | 0.51                            | 0.52                           | 0.53                            | 0.54                                   |

**Table S2: Sensitivity of estimated effects of temperature and rainfall on  $PfPR_{2-10}$  to alternative spatiotemporal controls.** All columns show regression results for a dependent variable of malaria prevalence for children aged 2-10 ( $PfPR_{2-10}$ ). All include fixed effects (i.e., dummy variables) at the scale of the first administrative unit (i.e., ADM1). Other model controls by column are: (1) country, year, and month fixed effects; (2) country-specific quadratic time trends and month fixed effects; (3) country-specific quadratic time trends and country-by-month fixed effects; (4) country-specific quadratic time trends and intervention period and month fixed effects; (5) country-specific quadratic time trends and intervention period and region-by-month fixed effects; (6) country-specific quadratic time trends and intervention period and country-by-month fixed effects; (7) region-by-year and region-by-month fixed effects; (8) region-by-year and country-by-month fixed effects; (9) and region-by-year and region-by-month fixed effects and country-specific linear time trends. The preferred specification used throughout the main text is column (5). In columns (5) and (7)-(9), "region" refers to the Global Burden of Disease regional definitions of western, southern, central, and eastern Africa. All standard errors are clustered at the first administrative unit (e.g., province) level.

## 570 References

- 571 1. Romanello, M, Di Napoli, C, Drummond, P, Green, C, Kennard, H, Lampard, P,  
572 Scamman, D, Arnell, N, Ayeb-Karlsson, S, Ford, L. B, et al. (2022) The 2022 report  
573 of the lancet countdown on health and climate change: health at the mercy of fossil  
574 fuels. *The Lancet* **400**, 1619–1654.
- 575 2. Ebi, K. L, Åström, C, Boyer, C. J, Harrington, L. J, Hess, J. J, Honda, Y, Kazura, E,  
576 Stuart-Smith, R. F, & Otto, F. E. (2020) Using detection and attribution to quantify  
577 how climate change is affecting health: Study explores detection and attribution to  
578 examine how climate change is affecting health. *Health Affairs* **39**, 2168–2174.
- 579 3. Carlson, C. J, Lukas-Sithole, M, Shumba, D. S, North, M, Lippi, C, Gibb, R, Car-  
580 leton, T, Chersich, M, Lavelle, T, Mitchell, D, New, M, Ryan, S. J, & Trisos, C. H.  
581 (2024) Detection and attribution of climate change impacts on human health: A  
582 data science framework. *Wellcome Open Research* **9**, 245.
- 583 4. Snow, R. W, Sartorius, B, Kyalo, D, Maina, J, Amratia, P, Mundia, C. W, Bejon,  
584 P, & Noor, A. M. (2017) The prevalence of *Plasmodium falciparum* in sub-Saharan  
585 Africa since 1900. *Nature* **550**, 515–518.
- 586 5. Alcayna, T, Fletcher, I, Gibb, R, Tremblay, L, Funk, S, Rao, B, & Lowe, R. (2022)  
587 Climate-sensitive disease outbreaks in the aftermath of extreme climatic events: a  
588 scoping review. *One Earth* **5**, 336–350.
- 589 6. Mordecai, E. A, Paaijmans, K. P, Johnson, L. R, Balzer, C, Ben-Horin, T, de Moor,  
590 E, McNally, A, Pawar, S, Ryan, S. J, Smith, T. C, et al. (2013) Optimal temperature  
591 for malaria transmission is dramatically lower than previously predicted. *Ecology*  
592 *Letters* **16**, 22–30.
- 593 7. Mordecai, E. A, Caldwell, J. M, Grossman, M. K, Lippi, C. A, Johnson, L. R, Neira,  
594 M, Rohr, J. R, Ryan, S. J, Savage, V, Shocket, M. S, et al. (2019) Thermal biology  
595 of mosquito-borne disease. *Ecology Letters* **22**, 1690–1708.
- 596 8. Villena, O. C, Ryan, S. J, Murdock, C. C, & Johnson, L. R. (2022) Temperature  
597 impacts the environmental suitability for malaria transmission by *Anopheles gambiae*  
598 and *Anopheles stephensi*. *Ecology* p. e3685.
- 599 9. Ryan, S. J, McNally, A, Johnson, L. R, Mordecai, E. A, Ben-Horin, T, Paaijmans,  
600 K, & Lafferty, K. D. (2015) Mapping physiological suitability limits for malaria in  
601 Africa under climate change. *Vector-Borne and Zoonotic Diseases* **15**, 718–725.
- 602 10. Ryan, S. J, Lippi, C. A, & Zermoglio, F. (2020) Shifting transmission risk for malaria  
603 in Africa with climate change: a framework for planning and intervention. *Malaria*  
604 *Journal* **19**, 1–14.

- 605 11. Caminade, C, McIntyre, K. M, & Jones, A. E. (2019) Impact of recent and future cli-  
606 mate change on vector-borne diseases. *Annals of the New York Academy of Sciences*  
607 **1436**, 157–173.
- 608 12. Murdock, C, Sternberg, E, & Thomas, M. (2016) Malaria transmission potential  
609 could be reduced with current and future climate change. *Scientific Reports* **6**, 1–7.
- 610 13. Yamana, T. K, Bomblies, A, & Eltahir, E. A. (2016) Climate change unlikely to  
611 increase malaria burden in West Africa. *Nature Climate Change* **6**, 1009–1013.
- 612 14. Loevinsohn, M. E. (1994) Climatic warming and increased malaria incidence in  
613 rwanda. *The Lancet* **343**, 714–718.
- 614 15. Ezzati, M, Lopez, A. D, Rodgers, A. A, & Murray, C. J. (2004) *Comparative quan-*  
615 *tification of health risks: global and regional burden of disease attributable to selected*  
616 *major risk factors*. (World Health Organization).
- 617 16. Hay, S. I, Rogers, D. J, Randolph, S. E, Stern, D. I, Cox, J, Shanks, G. D, & Snow,  
618 R. W. (2002) Hot topic or hot air? Climate change and malaria resurgence in East  
619 African highlands. *Trends in Parasitology* **18**, 530–534.
- 620 17. Alsop, Z. (2007) Malaria returns to Kenya’s highlands as temperatures rise. *The*  
621 *Lancet* **370**, 925–926.
- 622 18. Shanks, G. D, Hay, S. I, Omumbo, J. A, & Snow, R. W. (2005) Malaria in kenya’s  
623 western highlands. *Emerging infectious diseases* **11**, 1425.
- 624 19. Gething, P. W, Smith, D. L, Patil, A. P, Tatem, A. J, Snow, R. W, & Hay, S. I.  
625 (2010) Climate change and the global malaria recession. *Nature* **465**, 342–345.
- 626 20. Zhou, G, Minakawa, N, Githeko, A. K, & Yan, G. (2004) Association between climate  
627 variability and malaria epidemics in the east african highlands. *Proceedings of the*  
628 *National Academy of Sciences* **101**, 2375–2380.
- 629 21. Pascual, M, Ahumada, J. A, Chaves, L. F, Rodo, X, & Bouma, M. (2006) Malaria  
630 resurgence in the East African highlands: temperature trends revisited. *Proceedings*  
631 *of the National Academy of Sciences* **103**, 5829–5834.
- 632 22. Pascual, M, Cazelles, B, Bouma, M, Chaves, L, & Koelle, K. (2008) Shifting patterns:  
633 malaria dynamics and rainfall variability in an african highland. *Proceedings of the*  
634 *Royal Society B: Biological Sciences* **275**, 123–132.
- 635 23. Omumbo, J. A, Lyon, B, Waweru, S. M, Connor, S. J, & Thomson, M. C. (2011)  
636 Raised temperatures over the kericho tea estates: revisiting the climate in the east  
637 african highlands malaria debate. *Malaria Journal* **10**, 1–16.
- 638 24. Alonso, D, Bouma, M. J, & Pascual, M. (2010) Epidemic malaria and warmer  
639 temperatures in recent decades in an East African highland. *Proceedings of the*  
640 *Royal Society B: Biological Sciences* **278**, 1661–1669.

- 641 25. Hay, S. I, Myers, M. F, Burke, D. S, Vaughn, D. W, Endy, T, Ananda, N, Shanks,  
642 G. D, Snow, R. W, & Rogers, D. J. (2000) Etiology of interepidemic periods of  
643 mosquito-borne disease. *Proceedings of the National Academy of Sciences* **97**, 9335–  
644 9339.
- 645 26. Shanks, G, Biomndo, K, Hay, S, & Snow, R. (2000) Changing patterns of clinical  
646 malaria since 1965 among a tea estate population located in the kenyan highlands.  
647 *Transactions of the Royal Society of Tropical Medicine and Hygiene* **94**, 253–255.
- 648 27. Shanks, G. D, Hay, S. I, Stern, D. I, Biomndo, K, & Snow, R. W. (2002) Meteorologic  
649 influences on plasmodium falciparum malaria in the highland tea estates of kericho,  
650 western kenya. *Emerging infectious diseases* **8**, 1404.
- 651 28. Hay, S. I, Cox, J, Rogers, D. J, Randolph, S. E, Stern, D. I, Shanks, G. D, Myers,  
652 M. F, & Snow, R. W. (2002) Climate change and the resurgence of malaria in the  
653 East African highlands. *Nature* **415**, 905.
- 654 29. Hay, S. I, Shanks, G. D, Stern, D. I, Snow, R. W, Randolph, S. E, & Rogers, D. J.  
655 (2005) Climate variability and malaria epidemics in the highlands of east africa.  
656 *Trends in parasitology* **21**, 52–53.
- 657 30. Stern, D. I, Gething, P. W, Kabaria, C. W, Temperley, W. H, Noor, A. M, Okiro,  
658 E. A, Shanks, G. D, Snow, R. W, & Hay, S. I. (2011) Temperature and malaria  
659 trends in highland east africa. *PloS one* **6**, e24524.
- 660 31. Krsulovic, F. A. M, Moulton, T. P, Lima, M, & Jacksic, F. (2021) Epidemic malaria  
661 dynamics in eastern africa highlands: the role of climate change and human popula-  
662 tion growth. *Ecol Evolut Bio* **6**, 23–30.
- 663 32. Chaves, L. F & Koenraadt, C. J. (2010) Climate change and highland malaria: fresh  
664 air for a hot debate. *The Quarterly review of biology* **85**, 27–55.
- 665 33. Siraj, A, Santos-Vega, M, Bouma, M, Yadeta, D, Carrascal, D. R, & Pascual, M.  
666 (2014) Altitudinal changes in malaria incidence in highlands of Ethiopia and Colom-  
667 bia. *Science* **343**, 1154–1158.
- 668 34. Rodó, X, Martinez, P. P, Siraj, A, & Pascual, M. (2021) Malaria trends in Ethiopian  
669 highlands track the 2000 ‘slowdown’ in global warming. *Nature Communications* **12**,  
670 1–12.
- 671 35. Ruiz, D, Brun, C, Connor, S. J, Omumbo, J. A, Lyon, B, & Thomson, M. C. (2014)  
672 Testing a multi-malaria-model ensemble against 30 years of data in the kenyan high-  
673 lands. *Malaria Journal* **13**, 1–14.
- 674 36. Pörtner, H.-O, Roberts, D. C, Adams, H, Adler, C, Aldunce, P, Ali, E, Begum, R. A,  
675 Betts, R, Kerr, R. B, Biesbroek, R, et al. (2022) *Climate Change 2022: Impacts,*  
676 *adaptation and vulnerability*. (IPCC Geneva, Switzerland:).

- 677 37. Callahan, C. W & Mankin, J. S. (2022) National attribution of historical climate  
678 damages. *Climatic Change* **172**, 40.
- 679 38. Swain, D. L, Singh, D, Touma, D, & Diffenbaugh, N. S. (2020) Attributing extreme  
680 events to climate change: a new frontier in a warming world. *One Earth* **2**, 522–527.
- 681 39. Stott, P. A, Christidis, N, Otto, F. E, Sun, Y, Vanderlinden, J.-P, van Oldenborgh,  
682 G. J, Vautard, R, von Storch, H, Walton, P, Yiou, P, et al. (2016) Attribution of ex-  
683 treme weather and climate-related events. *Wiley Interdisciplinary Reviews: Climate*  
684 *Change* **7**, 23–41.
- 685 40. Otto, F. E. (2017) Attribution of weather and climate events. *Annual Review of*  
686 *Environment and Resources* **42**, 627–646.
- 687 41. Noy, I, Stone, D, & Uher, T. (2024) Extreme events impact attribution: A state of  
688 the art. *Cell Reports Sustainability* **1**.
- 689 42. Carlson, C. J, Mitchell, D, Carleton, T, Chersich, M, Gibb, R, Lavelle, T, Lukas-  
690 Sithole, M, North, M, Lippi, C, New, M, et al. (2024) Designing and describing  
691 climate change impact attribution studies: a guide to common approaches.
- 692 43. Ebi, K. L, Ogden, N. H, Semenza, J. C, & Woodward, A. (2017) Detecting and  
693 attributing health burdens to climate change. *Environmental Health Perspectives*  
694 **125**, 085004.
- 695 44. Burke, M, González, F, Baylis, P, Heft-Neal, S, Baysan, C, Basu, S, & Hsiang, S.  
696 (2018) Higher temperatures increase suicide rates in the United States and Mexico.  
697 *Nature Climate Change* **8**, 723–729.
- 698 45. Carleton, T. A & Hsiang, S. M. (2016) Social and economic impacts of climate.  
699 *Science* **353**.
- 700 46. Organization, W. H et al. (2022) *World malaria report 2022*. (World Health Orga-  
701 nization).
- 702 47. Hsiang, S. (2016) Climate econometrics. *Annual Review of Resource Economics* **8**,  
703 43–75.
- 704 48. Carleton, T, Jina, A, Delgado, M, Greenstone, M, Houser, T, Hsiang, S, Hultgren,  
705 A, Kopp, R. E, McCusker, K. E, Nath, I, et al. (2022) Valuing the global mortality  
706 consequences of climate change accounting for adaptation costs and benefits. *The*  
707 *Quarterly Journal of Economics* **137**, 2037–2105.
- 708 49. Smith, M. W, Willis, T, Mroz, E, James, W. H, Klaar, M. J, Gosling, S. N, &  
709 Thomas, C. J. (2024) Future malaria environmental suitability in africa is sensitive  
710 to hydrology. *Science* **384**, 697–703.

- 711 50. Adeola, A. M, Botai, J. O, Rautenbach, H, Adisa, O. M, Ncongwane, K. P, Botai,  
712 C. M, & Adebayo-Ojo, T. C. (2017) Climatic variables and malaria morbidity in  
713 mutale local municipality, south africa: a 19-year data analysis. *International journal*  
714 *of environmental research and public health* **14**, 1360.
- 715 51. Lindsay, S. W, Bødker, R, Malima, R, Msangeni, H. A, & Kisinza, W. (2000) Effect  
716 of 1997–98 el niño on highland malaria in tanzania. *The Lancet* **355**, 989–990.
- 717 52. Teklehaimanot, H. D, Lipsitch, M, Teklehaimanot, A, & Schwartz, J. (2004) Weather-  
718 based prediction of plasmodium falciparum malaria in epidemic-prone regions of  
719 ethiopia i. patterns of lagged weather effects reflect biological mechanisms. *Malaria*  
720 *journal* **3**, 1–11.
- 721 53. Boyce, R, Reyes, R, Matte, M, Ntaro, M, Mulogo, E, Metlay, J. P, Band, L, & Sied-  
722 ner, M. J. (2016) Severe flooding and malaria transmission in the western ugandan  
723 highlands: implications for disease control in an era of global climate change. *The*  
724 *Journal of infectious diseases* **214**, 1403–1410.
- 725 54. Paaijmans, K. P, Wandago, M. O, Githeko, A. K, & Takken, W. (2007) Unexpected  
726 high losses of anopheles gambiae larvae due to rainfall. *PloS one* **2**, e1146.
- 727 55. Govoetchan, R, Gnanguenon, V, Azondékon, R, Agossa, R. F, Sovi, A, Oké-Agbo, F,  
728 Ossè, R, & Akogbéto, M. (2014) Evidence for perennial malaria in rural and urban  
729 areas under the sudanian climate of kandi, northeastern benin. *Parasites & Vectors*  
730 **7**, 1–12.
- 731 56. Smith, M, Macklin, M, & Thomas, C. (2013) Hydrological and geomorphological  
732 controls of malaria transmission. *Earth-Science Reviews* **116**, 109–127.
- 733 57. Mouchet, J, Manguin, S, Sircoulon, J, Laventure, S, Faye, O, Onapa, A, Carnevale,  
734 P, Julvez, J, & Fontenille, D. (1998) Evolution of malaria in africa for the past 40  
735 years: impact of climatic and human factors. *Journal of the American Mosquito*  
736 *Control Association* **14**, 121–130.
- 737 58. Schultz, K. A & Mankin, J. S. (2019) Is temperature exogenous? the impact of civil  
738 conflict on the instrumental climate record in sub-saharan africa. *American Journal*  
739 *of Political Science* **63**, 723–739.
- 740 59. Auffhammer, M, Hsiang, S. M, Schlenker, W, & Sobel, A. (2011) Global climate  
741 models and climate data: a user guide for economists. *Unpublished manuscript* **1**,  
742 10529–10530.
- 743 60. Mordecai, E. A, Ryan, S. J, Caldwell, J. M, Shah, M. M, & LaBeaud, A. D. (2020)  
744 Climate change could shift disease burden from malaria to arboviruses in africa. *The*  
745 *Lancet Planetary Health* **4**, e416–e423.

- 746 61. Feachem, R. G, Chen, I, Akbari, O, Bertozzi-Villa, A, Bhatt, S, Binka, F, Boni,  
747 M. F, Buckee, C, Dieleman, J, Dondorp, A, et al. (2019) Malaria eradication within  
748 a generation: ambitious, achievable, and necessary. *The Lancet* **394**, 1056–1112.
- 749 62. Tian, H, Li, N, Li, Y, Kraemer, M. U, Tan, H, Liu, Y, Li, Y, Wang, B, Wu, P,  
750 Cazelles, B, et al. (2022) Malaria elimination on Hainan Island despite climate  
751 change. *Communications Medicine* **2**, 1–9.
- 752 63. Jaramillo-Ochoa, R, Sippy, R, Farrell, D. F, Cueva-Aponte, C, Beltrán-Ayala, E,  
753 Gonzaga, J. L, Ordoñez-León, T, Quintana, F. A, Ryan, S. J, & Stewart-Ibarra,  
754 A. M. (2019) Effects of political instability in Venezuela on malaria resurgence at  
755 Ecuador–Peru border, 2018. *Emerging Infectious Diseases* **25**, 834.
- 756 64. Walker, P. G, White, M. T, Griffin, J. T, Reynolds, A, Ferguson, N. M, & Ghani,  
757 A. C. (2015) Malaria morbidity and mortality in Ebola-affected countries caused by  
758 decreased health-care capacity, and the potential effect of mitigation strategies: a  
759 modelling analysis. *The Lancet Infectious Diseases* **15**, 825–832.
- 760 65. Miazgowicz, K, Shocket, M, Ryan, S, Villena, O, Hall, R, Owen, J, Adanlawo, T,  
761 Balaji, K, Johnson, L, Mordecai, E, et al. (2020) Age influences the thermal suitability  
762 of *Plasmodium falciparum* transmission in the Asian malaria vector *Anopheles*  
763 *stephensi*. *Proceedings of the Royal Society B* **287**, 20201093.
- 764 66. Sinka, M, Pironon, S, Massey, N, Longbottom, J, Hemingway, J, Moyes, C, & Willis,  
765 K. (2020) A new malaria vector in africa: Predicting the expansion range of anopheles  
766 stephensi and identifying the urban populations at risk. *Proceedings of the National*  
767 *Academy of Sciences* **117**, 24900–24908.
- 768 67. Ryan, S. J, Lippi, C. A, Villena, O. C, Singh, A. H, Murdock, C. C, & Johnson,  
769 L. R. (2022) Mapping current and future thermal limits to suitability for malaria  
770 transmission by the invasive mosquito anopheles stephensi. *bioRxiv* pp. 2022–12.
- 771 68. Harris, I, Osborn, T. J, Jones, P, & Lister, D. (2020) Version 4 of the cru ts monthly  
772 high-resolution gridded multivariate climate dataset. *Scientific data* **7**, 1–18.
- 773 69. Gidden, M, Riahi, K, Smith, S, Fujimori, S, Luderer, G, Kriegler, E, van Vuuren,  
774 D. P, van den Berg, M, Feng, L, Klein, D, et al. (2019) Global emissions pathways  
775 under different socioeconomic scenarios for use in CMIP6: a dataset of harmonized  
776 emissions trajectories through the end of the century. *Geoscientific Model Develop-*  
777 *ment Discussions* **12**, 1443–1475.
- 778 70. O’Neill, B. C, Tebaldi, C, Van Vuuren, D. P, Eyring, V, Friedlingstein, P, Hurtt, G,  
779 Knutti, R, Kriegler, E, Lamarque, J.-F, Lowe, J, et al. (2016) The Scenario Model In-  
780 tercomparison Project (ScenarioMIP) for CMIP6. *Geoscientific Model Development*  
781 **9**, 3461–3482.



- 782 71. Van Vuuren, D. P, Kriegler, E, O'Neill, B. C, Ebi, K. L, Riahi, K, Carter, T. R,  
783 Edmonds, J, Hallegatte, S, Kram, T, Mathur, R, et al. (2014) A new scenario frame-  
784 work for climate change research: scenario matrix architecture. *Climatic Change*  
785 **122**, 373–386.
- 786 72. Kriegler, E, Bauer, N, Popp, A, Humpenöder, F, Leimbach, M, Strefler, J, Baum-  
787 stark, L, Bodirsky, B. L, Hilaire, J, Klein, D, et al. (2017) Fossil-fueled development  
788 (SSP5): an energy and resource intensive scenario for the 21st century. *Global Envi-  
789 ronmental Change* **42**, 297–315.
- 790 73. Fricko, O, Havlik, P, Rogelj, J, Klimont, Z, Gusti, M, Johnson, N, Kolp, P, Strubeg-  
791 ger, M, Valin, H, Amann, M, et al. (2017) The marker quantification of the Shared  
792 Socioeconomic Pathway 2: A middle-of-the-road scenario for the 21st century. *Global  
793 Environmental Change* **42**, 251–267.
- 794 74. Cannon, A. J, Sobie, S. R, & Murdock, T. Q. (2015) Bias correction of GCM pre-  
795 cipitation by quantile mapping: How well do methods preserve changes in quantiles  
796 and extremes? *Journal of Climate* **28**, 6938–6959.
- 797 75. Cayan, D. R, Maurer, E. P, Dettinger, M. D, Tyree, M, & Hayhoe, K. (2008) Climate  
798 change scenarios for the California region. *Climatic Change* **87**, 21–42.
- 799 76. Artzy-Randrup, Y, Alonso, D, & Pascual, M. (2010) Transmission intensity and drug  
800 resistance in malaria population dynamics: implications for climate change. *PloS one*  
801 **5**, e13588.
- 802 77. Laneri, K, Paul, R. E, Tall, A, Faye, J, Diene-Sarr, F, Sokhna, C, Trape, J.-F, &  
803 Rodó, X. (2015) Dynamical malaria models reveal how immunity buffers effect of  
804 climate variability. *Proceedings of the National Academy of Sciences* **112**, 8786–8791.
- 805 78. Cervellati, M, Esposito, E, & Sunde, U. (2022) Epidemic shocks and civil violence:  
806 Evidence from malaria outbreaks in africa. *The Review of Economics and Statistics*  
807 **104**, 780–796.
- 808 79. Schlenker, W & Roberts, M. J. (2009) Nonlinear temperature effects indicate severe  
809 damages to us crop yields under climate change. *Proceedings of the National Academy  
810 of sciences* **106**, 15594–15598.
- 811 80. Hsiang, S. M, Meng, K. C, & Cane, M. A. (2011) Civil conflicts are associated with  
812 the global climate. *Nature* **476**, 438–441.
- 813 81. Deschênes, O & Greenstone, M. (2007) The economic impacts of climate change:  
814 evidence from agricultural output and random fluctuations in weather. *American  
815 economic review* **97**, 354–385.
- 816 82. Kipruto, E. K, Ochieng, A. O, Anyona, D. N, Mbalanya, M, Mutua, E. N, Onguru,  
817 D, Nyamongo, I. K, & Estambale, B. (2017) Effect of climatic variability on malaria  
818 trends in baringo county, kenya. *Malaria journal* **16**, 1–11.

- 819 83. Moran, A. E, Oliver, J. T, Mirzaie, M, Forouzanfar, M. H, Chilov, M, Anderson, L,  
820 Morrison, J. L, Khan, A, Zhang, N, Haynes, N, et al. (2012) Assessing the global  
821 burden of ischemic heart disease: part 1: methods for a systematic review of the  
822 global epidemiology of ischemic heart disease in 1990 and 2010. *Global Heart* **7**,  
823 315–329.
- 824 84. Mabaso, M. L, Craig, M, Ross, A, & Smith, T. (2007) Environmental predictors  
825 of the seasonality of malaria transmission in africa: the challenge. *The American*  
826 *journal of tropical medicine and hygiene* **76**, 33–38.
- 827 85. Bhatt, S, Weiss, D, Cameron, E, Bisanzio, D, Mappin, B, Dalrymple, U, Battle,  
828 K, Moyes, C, Henry, A, Eckhoff, P, et al. (2015) The effect of malaria control on  
829 *Plasmodium falciparum* in Africa between 2000 and 2015. *Nature* **526**, 207–211.
- 830 86. Li, C & Managi, S. (2022) Global malaria infection risk from climate change. *Envi-*  
831 *ronmental Research* **214**, 114028.
